# Supplementary material for: Precise exome analysis of blastocyst biopsy scale samples using Primary Template directed Amplification
Source: Research Square preprint supplement (doi:10.21203/rs.3.rs-6745778/v1), 2025-06-09
Supplement: Supplementary file 1 [file 07113023a99a5ae938527c84.xlsx]

## Sheet: Sheet1
Table 2.	ACMG gene coverage metrics
Sample	ACTA2	ACTC1	ACVRL1	APC	APOB	ATP7B	BAG3	BMPR1A	BRCA1	BRCA2	BTD	CACNA1S	CALM1	CALM2	CALM3	CASQ2	COL3A1	DES	DSC2	DSG2	DSP	ENG	FBN1	FLNC	GAA	GLA	HFE	HNF1A	KCNH2	KCNQ1	LDLR	LMNA	MAX	MEN1	MLH1	MSH2	MSH6	MUTYH	MYBPC3	MYH11	MYH7	MYL2	MYL3	NF2	OTC	PALB2	PCSK9	PKP2	PMS2
f-4-3	1	1	0.903205	1	1	1	1	0.854167	1	1	0.598333	1	0.857143	1	1	1	1	1	1	1	1	1	0.970149	1	1	1	1	1	0.993295	0.957666	0.98996	1	1	1	1	0.66852	0.846154	1	1	1	1	1	1	1	1	1	0.923077	1	0.909235
f-4-1	1	1	0.9	1	1	1	1	0.846154	1	1	0.66077	1	0.857143	1	1	1	1	1	1	1	1	1	0.984852	1	1	0.968496	1	1	0.886635	0.947368	0.99336	1	1	1	1	0.680893	0.846154	0.944444	1	1	1	1	1	1	1	1	0.946842	1	0.941176
f-16-2	1	1	0.9	1	1	1	1	0.910256	1	1	0.683333	1	0.857143	1	1	1	1	1	1	1	1	1	0.997327	1	1	0.963415	1	1	0.941217	1	0.978462	1	1	1	1	0.69537	0.907051	0.944444	1	1	1	1	1	1	1	1	0.943715	1	0.895003
f-24-3	1	1	0.923718	1	1	1	1	0.846154	1	1	0.535979	1	0.857143	1	1	1	1	1	1	1	1	1	0.970149	1	1	0.875	1	1	0.946363	0.959382	0.98413	1	1	1	1	0.759203	0.846154	1	1	1	1	1	1	1	1	1	0.963727	1	0.92315
f-10-2	1	1	0.95641	1	1	1	1	0.923077	1	1	0.848527	1	0.857143	1	1	1	1	1	1	1	1	1	0.970149	1	1	0.875	1	1	0.922431	0.947368	0.967611	1	1	1	1	0.647889	0.916388	0.99537	1	1	1	1	1	1	1	1	1	1	0.895319
f-4-2	1	1	0.9	1	1	1	1	0.865641	1	1	0.3	1	0.857143	1	1	1	1	1	1	1	1	1	0.970149	1	1	0.988821	1	1	0.970158	0.947368	0.995304	1	1	1	1	0.783618	0.920673	0.944444	1	1	1	1	1	1	1	1	0.999375	1	0.903542
f-10-3	1	1	0.9	1	1	1	1	0.923077	1	1	0.822222	1	0.857143	1	1	1	1	1	1	1	1	1	0.977232	1	1	0.875	1	1	0.894402	0.947368	0.98834	1	1	1	1	0.734708	0.846154	0.888889	1	1	1	1	1	1	1	1	0.963727	1	0.922517
f-24-2	1	1	0.9	1	1	1	1	0.846154	1	1	0.584682	1	0.857143	1	1	1	1	1	1	1	1	1	0.974605	1	1	1	1	1	0.842105	0.947368	0.976032	1	1	1	1	0.601416	0.875	0.944444	1	1	1	1	1	1	1	1	0.997498	1	0.90291
f-16-3	1	1	0.903205	1	1	1	1	0.846154	1	1	0.60892	1	1	1	1	1	1	1	1	1	1	1	0.970149	1	1	0.875	1	1	0.894737	0.947368	0.97749	1	1	1	1	0.690279	0.923077	0.944444	1	1	1	1	1	1	1	1	0.923077	1	0.882353
e701 - 64	1	1	0.998718	1	1	1	1	0.923077	1	1	0.57721	1	0.857143	1	1	1	1	1	1	1	1	1	0.970149	1	1	0.875	1	1	0.906492	0.947368	0.974413	1	1	1	1	0.695232	0.846154	1	1	1	1	1	1	1	1	1	0.933709	1	0.887097
na12828 - 256	1	1	0.978846	1	1	1	1	0.915064	1	1	0.495302	1	0.857143	1	1	1	1	1	1	1	1	1	0.972426	1	1	0.875	1	1	0.986671	0.95881	0.98251	1	1	1	1	0.758153	0.950704	0.944444	1	1	1	1	1	1	1	1	0.923077	1	0.944655
f-10-1	1	1	0.996154	1	1	1	1	0.881026	1	1	0.8	1	1	1	1	1	1	1	1	1	1	1	0.977501	1	1	0.875	1	1	0.894737	1	0.967773	1	1	1	1	0.689232	0.864548	0.944444	1	1	1	1	1	1	1	1	0.953721	1	0.921885
e701-256	1	1	0.9	1	1	1	1	0.918269	1	1	0.820772	1	0.857143	1	1	1	1	0.907407	1	1	1	1	0.970149	1	1	0.875	1	1	0.978994	0.947368	0.979433	1	1	1	1	0.712743	0.850962	0.888889	1	1	1	1	1	1	1	1	0.996248	1	0.909551
f-16-1	1	1	0.945513	1	1	1	1	0.887821	1	1	0.584554	1	0.857143	1	1	1	1	1	1	1	1	1	0.990444	1	1	0.930894	1	1	0.936774	1	0.994494	1	1	1	1	0.613876	0.923077	0.944444	1	1	1	1	1	1	1	1	0.923077	1	0.902277
na12828 - 64	1	1	0.930128	1	1	1	1	0.858974	1	1	0.544167	1	1	1	1	1	1	1	1	1	1	1	0.970149	1	1	0.968496	1	1	0.927925	0.954805	0.966316	1	1	1	1	0.673541	0.923077	0.944444	1	1	1	1	1	1	1	1	0.923077	1	0.915876
f-24-1	1	1	0.964103	1	1	1	1	0.846154	1	1	0.646369	1	0.857143	1	1	1	1	1	1	1	1	1	0.970149	1	1	0.905488	1	1	0.967469	0.947368	0.996923	1	1	1	1	0.694131	0.86859	0.888889	1	1	1	1	1	1	1	1	0.923077	1	0.927894
[truncated: 32 more columns]
