# Supplementary material for: Precise exome analysis of blastocyst biopsy scale samples using Primary Template directed Amplification
Source: Research Square preprint supplement (doi:10.21203/rs.3.rs-6745778/v1), 2025-06-09
Supplement: Supplementary file 2 [file bb5a5fc814fb7c6d2ea06370.xlsx]

## Sheet: Sheet 1
Sample ID	fq.gz GB	Duplicates	Insert Size	ELS	BAIT_SET	BAIT_TERRITORY	BAIT_DESIGN_EFFICIENCY	ON_BAIT_BASES	NEAR_BAIT_BASES	OFF_BAIT_BASES	PCT_SELECTED_BASES	PCT_OFF_BAIT	ON_BAIT_VS_SELECTED	MEAN_BAIT_COVERAGE	PCT_USABLE_BASES_ON_BAIT	PCT_USABLE_BASES_ON_TARGET	FOLD_ENRICHMENT	HS_LIBRARY_SIZE	HS_PENALTY_10X	HS_PENALTY_20X	HS_PENALTY_30X	HS_PENALTY_40X	HS_PENALTY_50X	HS_PENALTY_100X	TARGET_TERRITORY	GENOME_SIZE	TOTAL_READS	PF_READS	PF_BASES	PF_UNIQUE_READS	PF_UQ_READS_ALIGNED	PF_BASES_ALIGNED	PF_UQ_BASES_ALIGNED	ON_TARGET_BASES	PCT_PF_READS	PCT_PF_UQ_READS	PCT_PF_UQ_READS_ALIGNED	MEAN_TARGET_COVERAGE	MEDIAN_TARGET_COVERAGE	MAX_TARGET_COVERAGE	MIN_TARGET_COVERAGE	ZERO_CVG_TARGETS_PCT	PCT_EXC_DUPE	PCT_EXC_ADAPTER	PCT_EXC_MAPQ	PCT_EXC_BASEQ	PCT_EXC_OVERLAP	PCT_EXC_OFF_TARGET	FOLD_80_BASE_PENALTY
PTA-1	7.86	12.3351	225	132 334 443	v8_Regions	35241032	1	4310797504	3267423079	1294809930	0.8541	0.1459	0.56884	122.323	0.483638	0.343972	42.6771	108691159	7.18327	7.50236	7.85417	8.26326	8.72471	13.1821	35241032	3095693983	71 306 240	71306240	8913280000	62516267	62469614	8873030513	7789619717	3065915646	1	0.876729	0.999254	86.9985	75	2945	0	0.0143	0.122102	0	0.037919	0.013281	0.095013	0.386162	2.7187
PTA-2	11.82	15.3692	233	154 660 356	v8_Regions	35241032	1	6661961310	4649242881	1923256968	0.8547	0.1453	0.58897	189.04	0.501297	0.350546	44.2186	124962232	8.06753	8.40842	8.78923	9.21917	9.72774	14.268	35241032	3095693983	106 315 604	106315604	13289450500	89985660	89921285	13234461159	11214755580	4658561891	1	0.846401	0.999285	132.191	105	2400	0	0.0129	0.15261	0	0.032346	0.013962	0.080803	0.368283	3.22418
PTA-3	11.57	13.0816	237	181 795 667	v8_Regions	35241032	1	6268873566	4789988017	1901136884	0.8533	0.1467	0.566864	177.886	0.481881	0.350307	42.4907	148661332	5.54987	5.68464	5.8224	5.97214	6.13387	7.15452	35241032	3095693983	104 491 434	104491434	13009183533	90831926	90758294	12959998467	11278492372	4557211387	1	0.869276	0.999189	129.315	113	2947	0	0.0127	0.129746	0	0.034791	0.014465	0.075	0.394367	2.19179
PTA-4	12.42	14.2908	227	177 394 044	v8_Regions	35241032	1	7086901338	4921692055	1992221399	0.8577	0.1423	0.590152	201.098	0.504278	0.352803	44.4644	145488540	6.13255	6.29776	6.48239	6.67675	6.8711	8.27046	35241032	3095693983	112 428 568	112428568	14053571000	96370344	96309262	14000814792	12015247300	4958138504	1	0.85717	0.999366	140.692	123	4279	0	0.0139	0.141818	0	0.029744	0.013122	0.093	0.368191	2.46828
PTA-5	12.57	14.2029	244	178 504 019	v8_Regions	35241032	1	6954646724	4960826438	2047982781	0.8533	0.1467	0.583665	197.345	0.495167	0.357827	43.7514	145663357	21.9326	24.3653	27.7892	33.0152	43.0398	-1	35241032	3095693983	112 360 536	112360536	14045067000	96419761	96295297	13963455943	12006365973	5025709900	1	0.858128	0.998709	142.61	76	5274	0	0.0223	0.140158	0	0.040742	0.01587	0.063828	0.379488	8.3888
PTA-6	14.09	14.9548	252	189 066 031	v8_Regions	35241032	1	7867620932	5692824820	2117774930	0.8649	0.1351	0.580189	223.252	0.499293	0.360221	44.0815	156526733	21.7012	23.8762	26.8632	31.2712	38.6488	-1	35241032	3095693983	126 060 236	126060236	15757529500	107226200	107105439	15678220682	13354618478	5676196705	1	0.850595	0.998874	161.068	112	4702	0	0.0146	0.148206	0	0.03829	0.016194	0.05718	0.37809	8.47725
PTA-7	14.03	14.7242	251	192 355 033	v8_Regions	35241032	1	7838349476	5680714256	2167951030	0.8618	0.1382	0.5798	222.421	0.497476	0.361824	43.8928	158614280	15.5237	16.5687	17.846	19.399	21.4455	-1	35241032	3095693983	126 049 824	126049824	15756228000	107506123	107396528	15687014762	13396834580	5700977356	1	0.852886	0.998981	161.771	112	3692	0	0.0146	0.145992	0	0.033028	0.015384	0.059171	0.383008	6.22196
MDA-1	5.61	15.77	230	102660808	v8_Regions	35241032	1	3581635418	2952349460	1370454787	0.826622	0.173378	0.548155	101.633	0.45109	0.336184	39.8034	78460598	-1	-1	-1	-1	-1	-1	35241032	3095693983	72 511 062	72511062	7939961289	61089806	61002479	7904439665	6667795365	2669289128	1	0.842489	0.998571	75.7438	0	35278	0	0.5513	0.156449	0	0.032956	0.006453	0.039226	0.427224	?
MDA-1	8.2	16.9414	244	137269142	v8_Regions	35241032	1	4951055724	4597131458	1957602686	0.829859	0.170141	0.518534	140.491	0.4294	0.320051	37.7999	106331098	-1	-1	-1	-1	-1	-1	35241032	3095693983	105 298 482	105298482	11530183779	87468885	87413157	11505789868	9567288067	3690245162	1	0.830676	0.999363	104.714	0	47168	0	0.5041	0.168481	0	0.051041	0.006982	0.027584	0.425186	?
MDA-1	8.33	20.2977	234	114692038	v8_Regions	35241032	1	5381843969	4592772384	1815127505	0.846042	0.153958	0.539554	152.715	0.455525	0.325515	40.0992	90254822	-1	-1	-1	-1	-1	-1	35241032	3095693983	108 390 832	108390832	11814600688	86403615	86336400	11789743858	9405374457	3845825030	1	0.797149	0.999222	109.129	6	40121	0	0.1353	0.202241	0	0.02293	0.005882	0.034839	0.407909	109.129
MDA-1	9.64	28.4002	233	88452264	v8_Regions	35241032	1	6003559442	5416889296	2294587673	0.832695	0.167305	0.525685	170.357	0.436389	0.276101	38.4522	67852811	-1	-1	-1	-1	-1	-1	35241032	3095693983	125 637 978	125637978	13757358591	89971888	89917869	13715036411	9849388244	3798416341	1	0.71612	0.9994	107.784	1	60157	0	0.4265	0.281855	0	0.030279	0.005193	0.031482	0.374241	?
MDA-1	12.4	15.1151	234	241553654	v8_Regions	35241032	1	8170672868	6995030036	2644339478	0.851525	0.148475	0.53876	231.851	0.457977	0.349266	40.2997	196480730	-1	-1	-1	-1	-1	-1	35241032	3095693983	162 929 482	162929482	17840778279	138308857	138266785	17810042382	15130305073	6231177814	1	0.848888	0.999696	176.816	5	29665	0	0.3098	0.150462	0	0.038722	0.006038	0.037475	0.417438	?
MDA-1	12.61	17.0053	232	214168344	v8_Regions	35241032	1	8155127350	7014711501	2863568396	0.841208	0.158792	0.537588	231.41	0.451343	0.334441	39.7249	171760659	-1	-1	-1	-1	-1	-1	35241032	3095693983	165 009 792	165009792	18068572224	136960081	136896895	18033407247	14984148006	6042874923	1	0.830012	0.999539	171.473	26	32395	0	0.1178	0.169089	0	0.034733	0.006019	0.039188	0.41588	171.473
[truncated: 20 more columns]
