# Supplementary material for: Precise exome analysis of blastocyst biopsy scale samples using Primary Template directed Amplification
Source: Research Square preprint supplement (doi:10.21203/rs.3.rs-6745778/v1), 2025-06-09
Supplement: Supplementary file 3 [file c2745b414d7adef688677491.xlsx]

## Sheet: Sheet 1
Table 1.	Summary of key metrics for exome sequencing.
Sample ID	fq.gz GB	Duplicates	Insert Size	ELS	BAIT_SET	BAIT_TERRITORY	BAIT_DESIGN_EFFICIENCY	ON_BAIT_BASES	NEAR_BAIT_BASES	OFF_BAIT_BASES	PCT_SELECTED_BASES	PCT_OFF_BAIT	ON_BAIT_VS_SELECTED	MEAN_BAIT_COVERAGE	PCT_USABLE_BASES_ON_BAIT	PCT_USABLE_BASES_ON_TARGET	FOLD_ENRICHMENT	HS_LIBRARY_SIZE	HS_PENALTY_10X	HS_PENALTY_20X	HS_PENALTY_30X	HS_PENALTY_40X	HS_PENALTY_50X	HS_PENALTY_100X	TARGET_TERRITORY	GENOME_SIZE	TOTAL_READS	PF_READS	PF_BASES	PF_UNIQUE_READS	PF_UQ_READS_ALIGNED	PF_BASES_ALIGNED	PF_UQ_BASES_ALIGNED	ON_TARGET_BASES	PCT_PF_READS	PCT_PF_UQ_READS	PCT_PF_UQ_READS_ALIGNED	MEAN_TARGET_COVERAGE	MEDIAN_TARGET_COVERAGE	MAX_TARGET_COVERAGE	MIN_TARGET_COVERAGE	ZERO_CVG_TARGETS_PCT	PCT_EXC_DUPE	PCT_EXC_ADAPTER	PCT_EXC_MAPQ	PCT_EXC_BASEQ	PCT_EXC_OVERLAP	PCT_EXC_OFF_TARGET	FOLD_80_BASE_PENALTY
f-4-1	24.9	21.9514	245	221 443 407	v8_Regions	35131620	1	13626941225	11891621147	3188907779	0.888917	0.111083	0.534001	387.883	0.475205	0.317195	44.5669	192104227	6.0949	6.22517	6.35879	6.49574	6.65007	7.56401	35131620	3298430636	229 407 510	229 407 510	28 675 938 750	179 055 713	179 026 886	28 707 470 151	22 463 177 168	9 095 869 647	1	0.7805	0.9998	258.908	240	5006	0	0.0132	0.2175	0	0.0279	0.0077	0.064	0.3661	2.4197
f-4-2	25.88	22.9534	284	213 981 832	v8_Regions	35131620	1	13014239418	13050623654	3191626888	0.890909	0.109091	0.499302	370.442	0.445284	0.309611	41.7644	185767591	5.11327	5.20523	5.3006	5.39937	5.51177	6.13302	35131620	3298430636	233 814 730	233 814 730	29 226 841 250	180 152 505	180 125 205	29 256 489 960	22 608 385 365	9 048 954 253	1	0.7705	0.9998	257.573	224	3454	0	0.0123	0.2272	0	0.0282	0.0105	0.0295	0.3952	2.01229
f-4-3	24.18	20.6085	266	229 305 758	v8_Regions	35131620	1	12506294699	12069386508	3013412615	0.890775	0.109225	0.508889	355.984	0.453758	0.319178	42.5599	199931365	5.43632	5.53235	5.63159	5.73403	5.84927	6.50999	35131620	3298430636	220 492 724	220 492 724	27 561 590 500	175 057 525	175 033 128	27 589 093 822	21 970 775 082	8 797 043 755	1	0.7939	0.9999	250.402	234	3871	0	0.0127	0.2036	0	0.0296	0.0093	0.0426	0.396	2.14019
f-10-1	26.78	25.0937	283	199 551 880	v8_Regions	35131620	1	13579611809	13599673419	3224293023	0.89395	0.10605	0.499631	386.535	0.447219	0.301944	41.9345	173727566	5.18121	5.27689	5.37966	5.48952	5.61498	6.32942	35131620	3298430636	242 916 770	242 916 770	30 364 596 250	181 966 109	181 941 323	30 403 578 251	22 847 961 965	9 168 403 802	1	0.7491	0.9999	260.973	233	3711	0	0.0125	0.2485	0	0.0261	0.0096	0.0297	0.3846	2.03885
f-10-2	27.32	22.9795	263	227 685 964	v8_Regions	35131620	1	14357272477	13370069359	3444625081	0.889496	0.110504	0.517802	408.671	0.46105	0.313215	43.2431	197776497	5.53294	5.63086	5.73967	5.84848	5.96164	6.65802	35131620	3298430636	249 123 266	249 123 266	31 140 408 250	191 882 283	191 854 438	31 171 966 917	24 076 563 062	9 753 633 086	1	0.7702	0.9999	277.631	253	5136	0	0.0129	0.2276	0	0.0265	0.0091	0.0443	0.3796	2.20342
f-10-3	25.09	22.7404	262	212 874 489	v8_Regions	35131620	1	13179104852	12601596914	2996883706	0.89586	0.10414	0.5112	375.135	0.45837	0.312177	42.9973	186582124	5.99255	6.12294	6.25333	6.40378	6.55021	7.49703	35131620	3298430636	230 017 032	230 017 032	28 752 129 000	177 716 800	177 687 899	28 777 585 472	22 305 349 179	8 975 760 574	1	0.7726	0.9998	255.49	242	4429	0	0.013	0.2249	0	0.0275	0.0083	0.046	0.3814	2.36564
f-16-1	22.98	23.6683	275	184 102 091	v8_Regions	35131620	1	11801455861	11561671198	2764324569	0.894198	0.105802	0.505132	335.921	0.452317	0.308051	42.408	160618418	5.09441	5.20396	5.31351	5.42307	5.55453	6.32872	35131620	3298430636	208 728 824	208 728 824	26 091 103 000	159 331 251	159 310 582	26 127 451 628	20 000 799 006	8 037 382 508	1	0.7633	0.9999	228.779	209	3385	0	0.0127	0.2345	0	0.0258	0.0096	0.0368	0.3857	2.00684
f-16-2	23.38	20.21	276	226 412 507	v8_Regions	35131620	1	11764250650	11989674499	2873092878	0.892099	0.107901	0.495255	334.862	0.442297	0.316332	41.4812	197770168	6.25003	6.37992	6.50364	6.65828	6.81044	7.74571	35131620	3298430636	212 784 670	212 784 670	26 598 083 750	169 785 858	169 760 899	26 627 018 027	21 298 037 669	8 413 828 240	1	0.7979	0.9999	239.494	226	4291	0	0.0128	0.2001	0	0.0268	0.01	0.037	0.4101	2.41914
f-16-3	23.73	22.3105	253	206 796 432	v8_Regions	35131620	1	12883817425	11635554684	2802606232	0.897423	0.102577	0.525455	366.73	0.471911	0.31836	44.2733	181602119	5.18544	5.28068	5.38861	5.4902	5.60448	6.29018	35131620	3298430636	218 410 920	218 410 920	27 301 365 000	169 689 727	169 656 937	27 321 978 341	21 289 469 446	8 691 663 641	1	0.7769	0.9998	247.403	235	4619	0	0.0131	0.2208	0	0.027	0.0079	0.0556	0.3706	2.07902
f-24-1	26.81	22.795	273	225 291 360	v8_Regions	35131620	1	13664714518	13560170446	3334011708	0.890899	0.109101	0.50192	388.958	0.447775	0.309627	41.9829	195742234	6.88146	7.03099	7.20188	7.38345	7.5693	8.78263	35131620	3298430636	244 135 114	244 135 114	30 516 889 250	188 490 133	188 465 100	30 558 896 672	23 649 853 082	9 448 848 213	1	0.7721	0.9999	268.956	244	5175	0	0.0128	0.2261	0	0.0246	0.0093	0.0369	0.3939	2.68956
f-24-2	24.34	21.4324	270	220 424 832	v8_Regions	35131620	1	12585357768	12226034831	2971473780	0.893047	0.106953	0.507241	358.234	0.453592	0.316673	42.5302	192588657	5.46963	5.56655	5.67316	5.78947	5.89802	6.61135	35131620	3298430636	221 968 074	221 968 074	27 746 009 250	174 399 781	174 376 951	27 782 866 379	21 882 132 524	8 786 416 988	1	0.7857	0.9999	250.1	236	4209	0	0.0129	0.2124	0	0.0263	0.0093	0.0416	0.3941	2.15603
f-24-3	25.01	22.0592	279	217 629 969	v8_Regions	35131620	1	12585762642	12745717788	3048770559	0.892574	0.107426	0.496843	358.246	0.443982	0.311542	41.6363	189467873	5.39763	5.49669	5.60564	5.7146	5.83148	6.53673	35131620	3298430636	226 779 928	226 779 928	28 347 491 000	176 759 454	176 735 355	28 380 250 989	22 179 652 670	8 831 442 729	1	0.7794	0.9999	251.382	236	4525	0	0.0126	0.2185	0	0.0265	0.0099	0.0333	0.4006	2.11245
e701-256	23.37	21.3767	276	211 764 131	v8_Regions	35131620	1	11927642115	11812636919	2844371885	0.893007	0.106993	0.502422	339.513	0.448841	0.315077	42.1243	184732474	4.93909	5.02231	5.11785	5.20723	5.31264	5.88962	35131620	3298430636	212 594 424	212 594 424	26 574 303 000	167 154 428	167 128 065	26 584 650 919	20 980 597 406	8 372 943 560	1	0.7863	0.9998	238.331	221	6145	0	0.0124	0.2108	0	0.0334	0.0096	0.0344	0.3969	1.93765
na12828 - 256	22.38	21.1771	279	204 651 168	v8_Regions	35131620	1	11268890909	11438418655	2695157834	0.893902	0.106098	0.496267	320.762	0.443623	0.313425	41.6499	179056987	5.15382	5.25094	5.35395	5.46284	5.57056	6.26277	35131620	3298430636	203 215 732	203 215 732	25 401 966 500	160 192 068	160 138 019	25 402 467 398	20 097 306 700	7 961 603 299	1	0.7883	0.9997	226.622	209	5106	0	0.0127	0.2088	0	0.0303	0.0101	0.0335	0.4038	2.00551
e701 - 64	21.05	21.4928	282	188 419 926	v8_Regions	35131620	1	10463904966	10778394476	2556960659	0.892561	0.107439	0.492598	297.849	0.439717	0.30959	41.28	164633644	6.28717	6.44427	6.60963	6.7998	6.99328	8.28974	35131620	3298430636	190 375 202	190 375 202	23 796 900 250	149 462 693	149 441 812	23 799 260 101	18 761 279 897	7 367 271 700	1	0.7851	0.9999	209.705	184	4834	0	0.0124	0.2117	0	0.0324	0.0105	0.0314	0.4045	2.4104
na12828 - 64	22.11	20.4757	239	213 889 802	v8_Regions	35131620	1	12418680579	10236565240	2863917549	0.887774	0.112226	0.548159	353.49	0.486684	0.327041	45.6897	185606781	5.79756	5.91287	6.04296	6.17011	6.31025	7.16179	35131620	3298430636	204 135 632	204 135 632	25 516 954 000	162 350 189	162 287 677	25 519 163 368	20 367 754 048	8 345 088 867	1	0.7953	0.9996	237.538	204	3916	0	0.0136	0.2019	0	0.0315	0.0074	0.0715	0.3607	2.3288
[truncated: 68 more columns]
