# Supplementary material for: Precise exome analysis of blastocyst biopsy scale samples using Primary Template directed Amplification
Source: Research Square preprint supplement (doi:10.21203/rs.3.rs-6745778/v1), 2025-06-09
Supplement: Supplementary file 4 [file dfa89f593d1b09c6f7c8bc8c.docx]

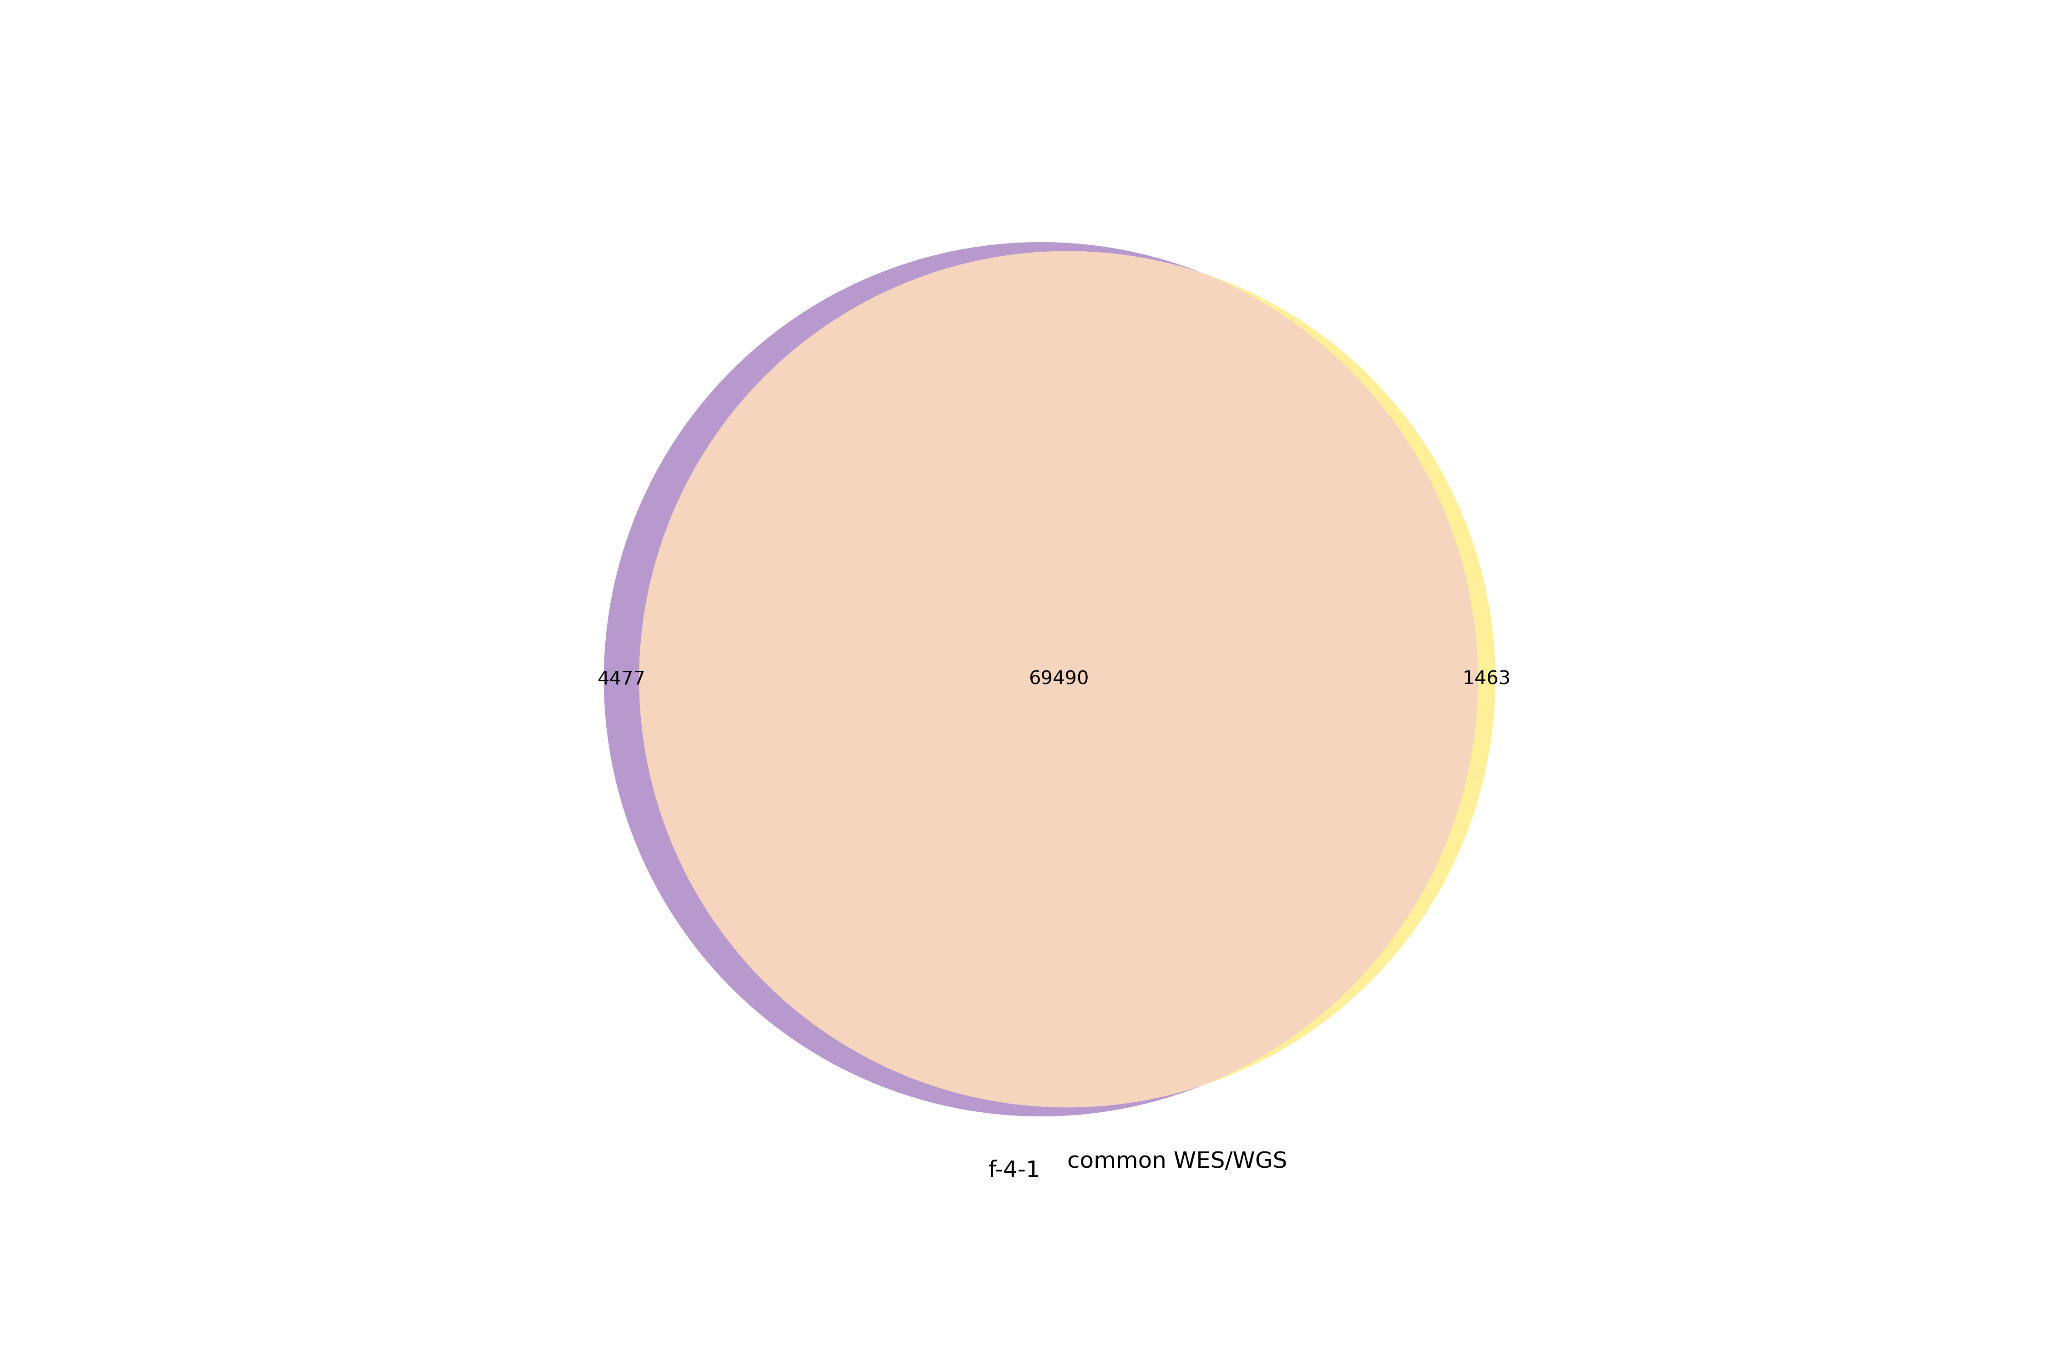

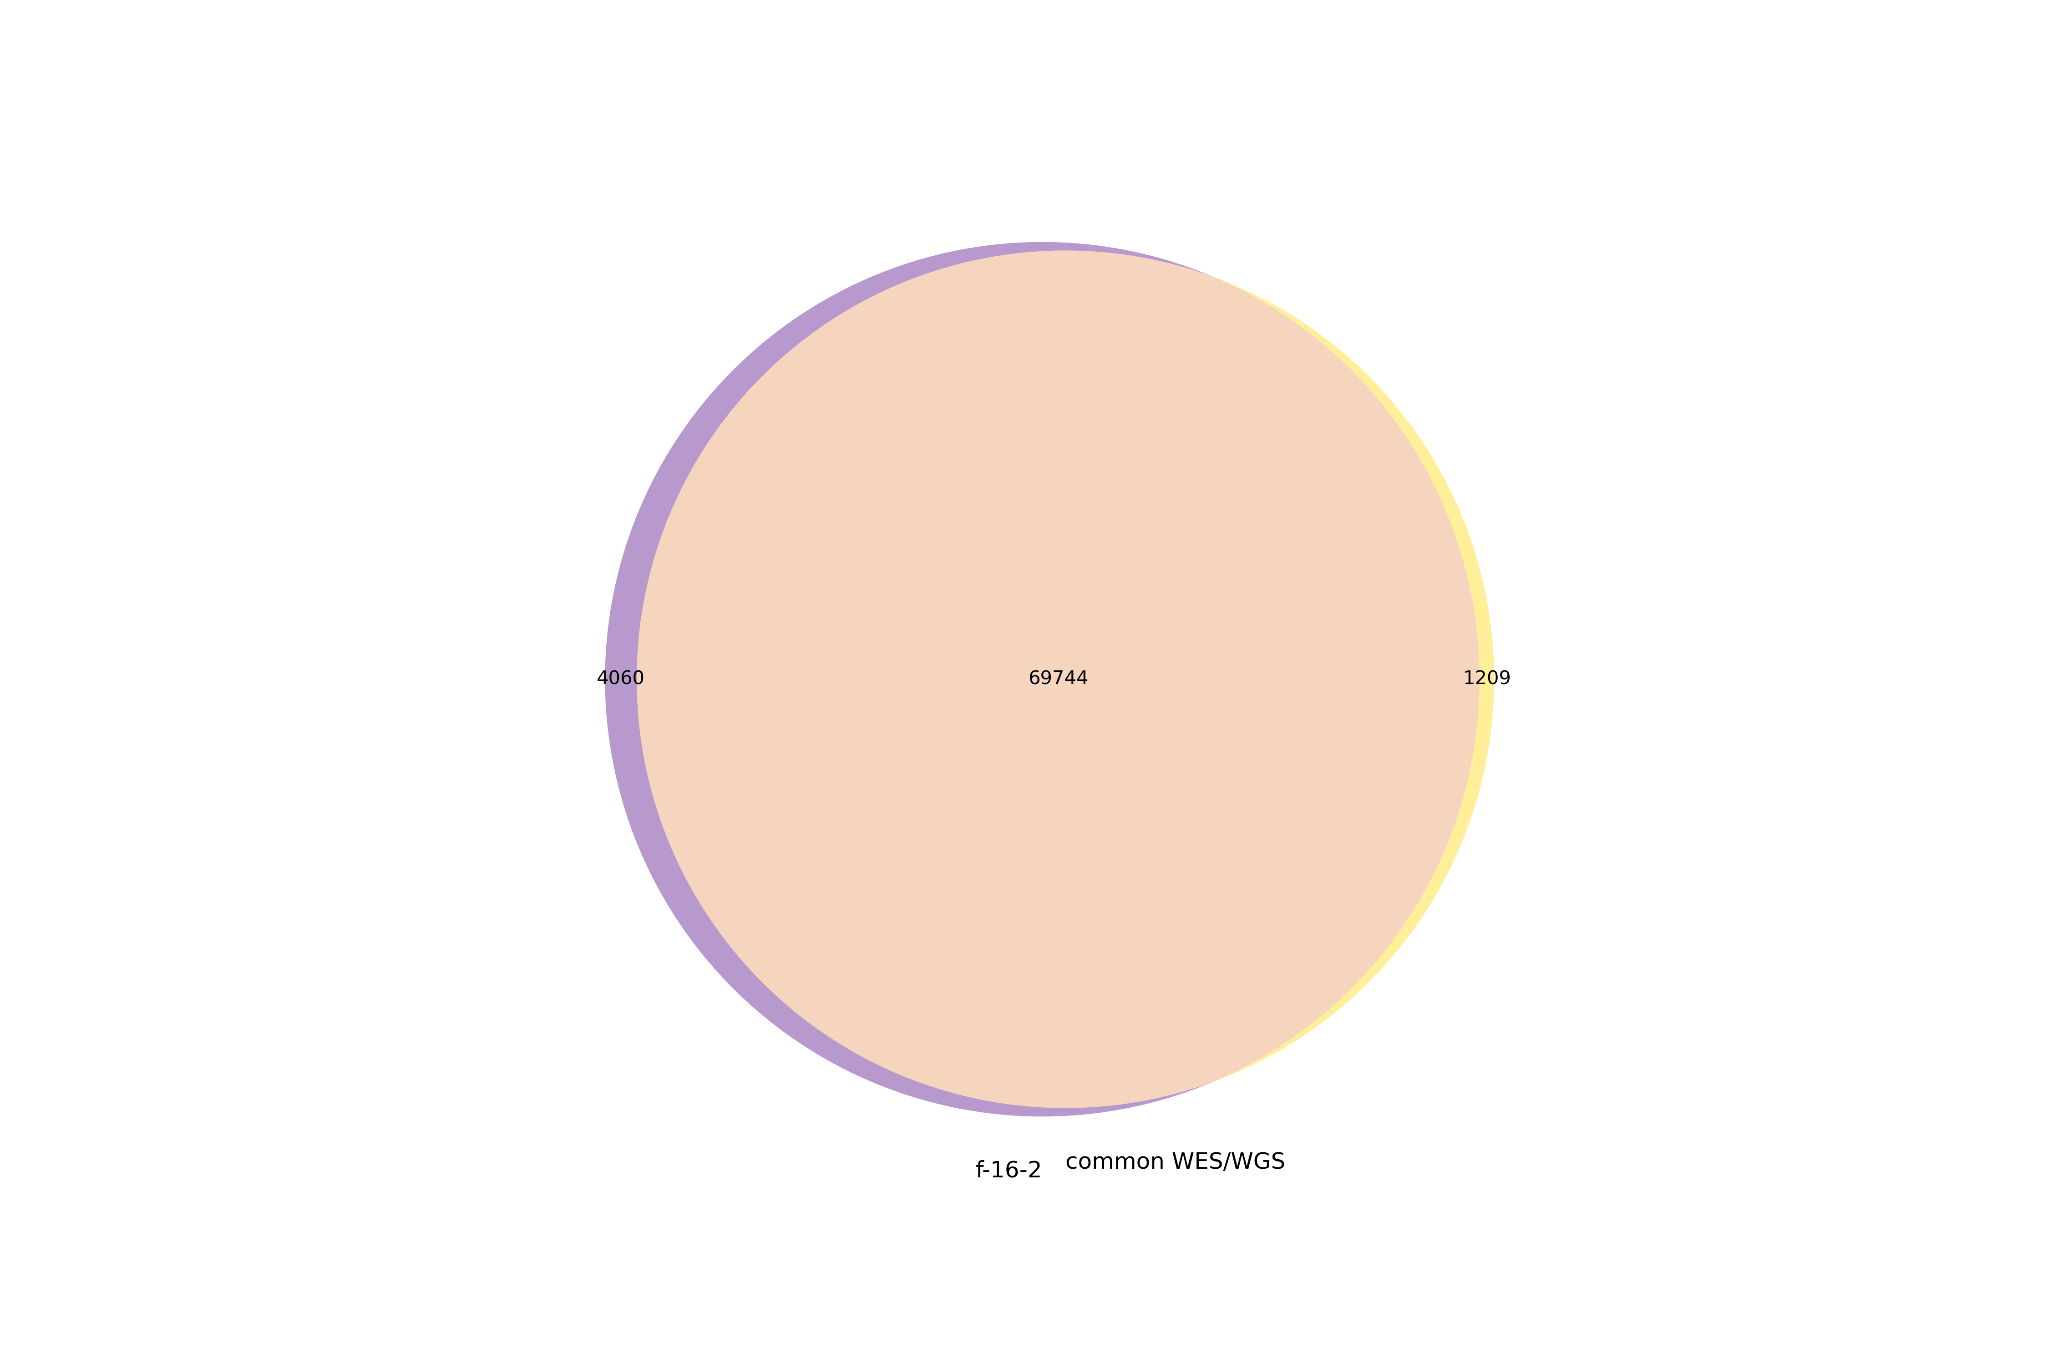

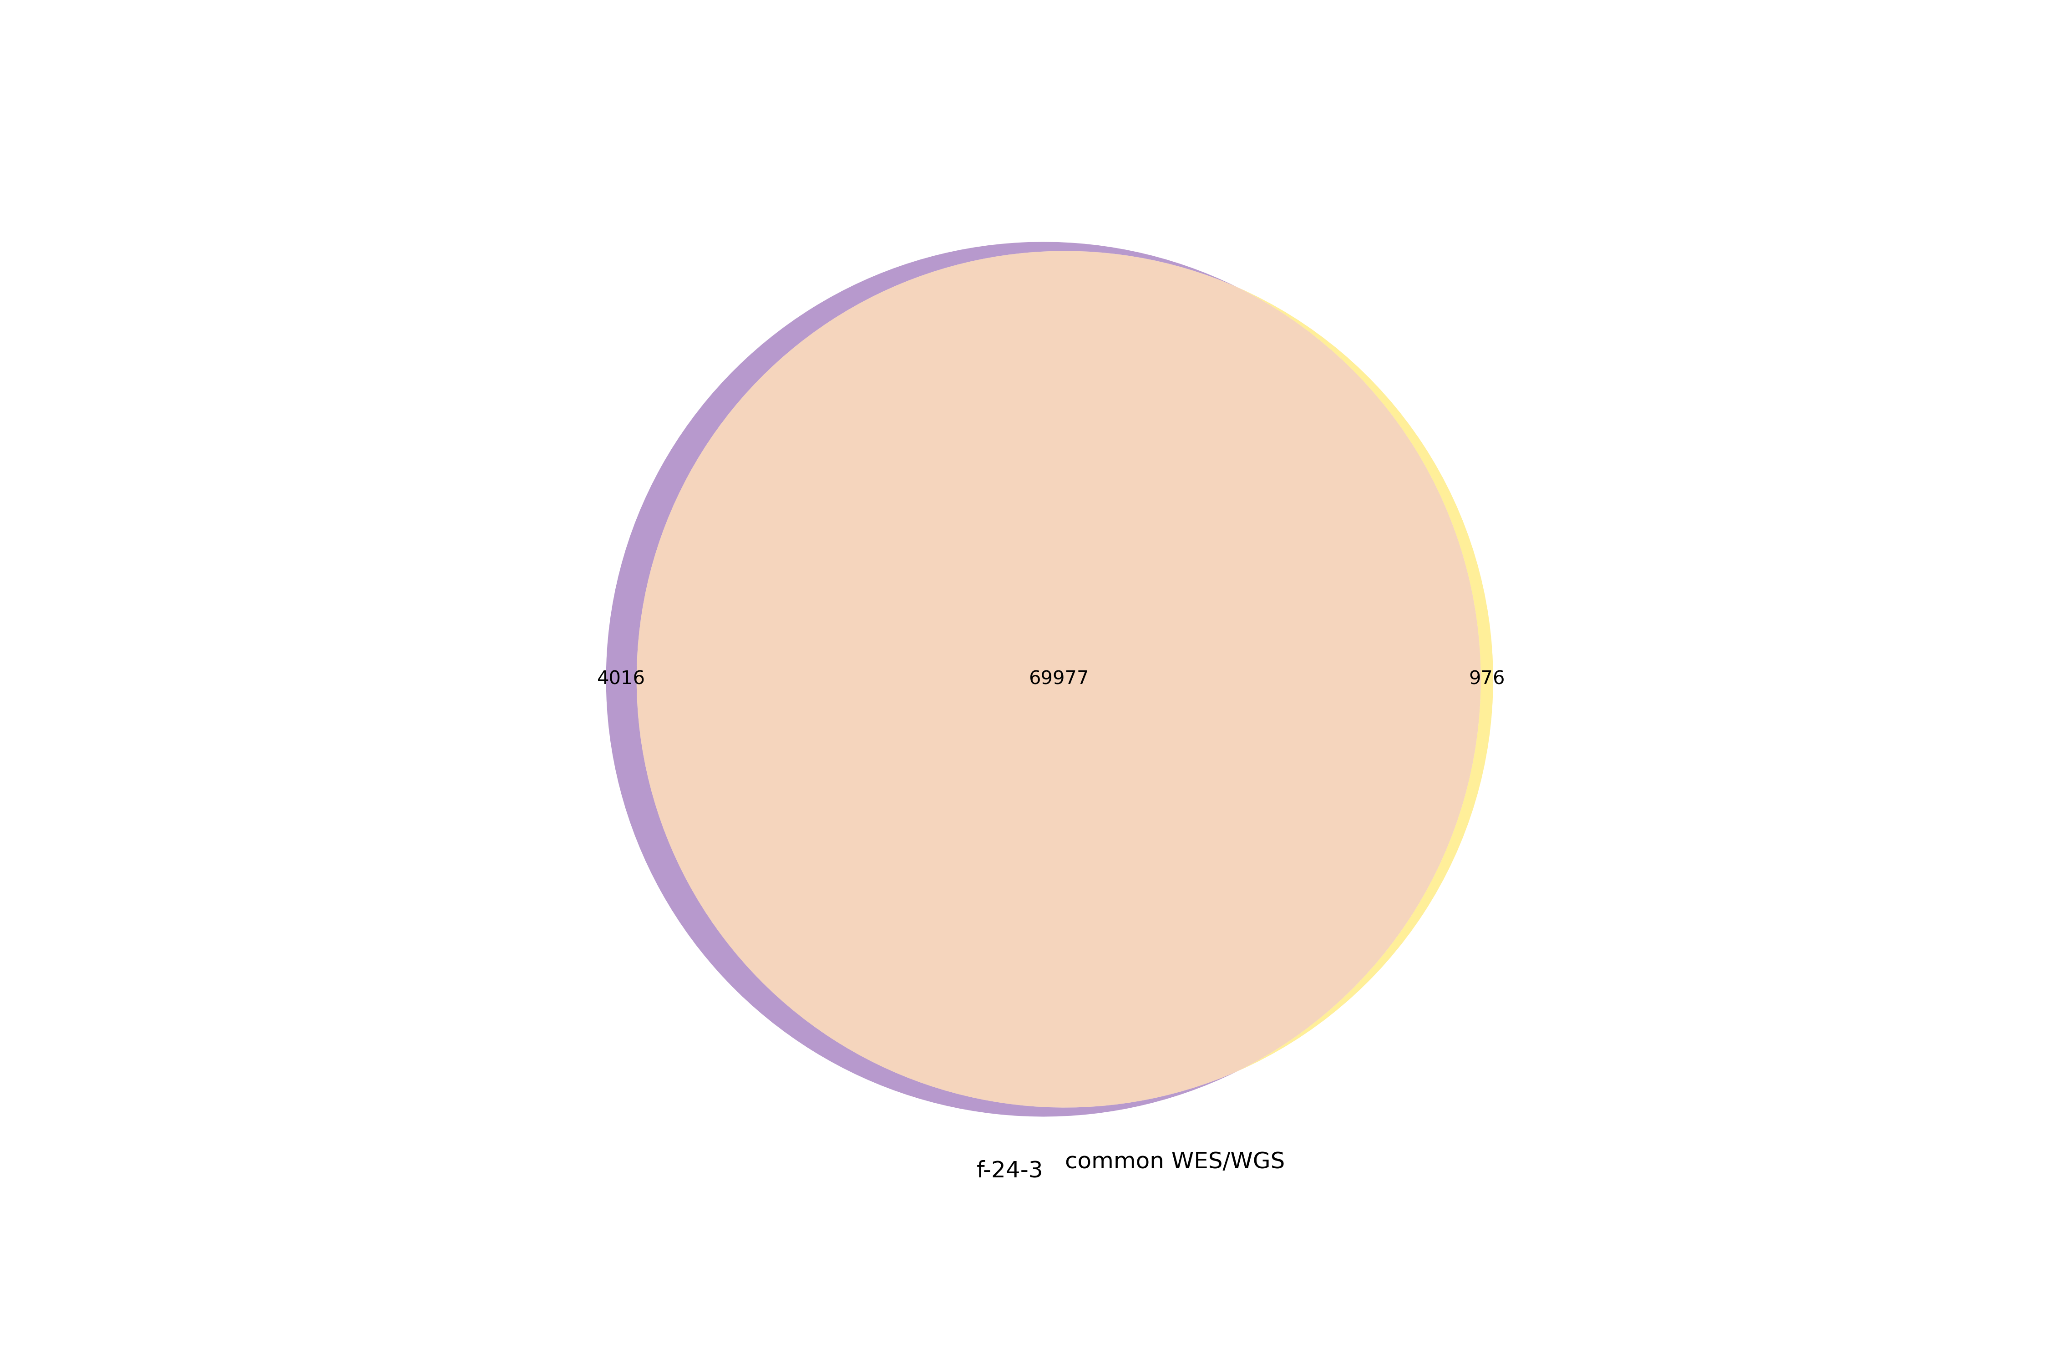


**Figure 9.** Venn diagrams illustrating the overlap between PTA-WES and common WES/WGS variants across samples with different initial cell numbers (4, 16, and 25 cells).


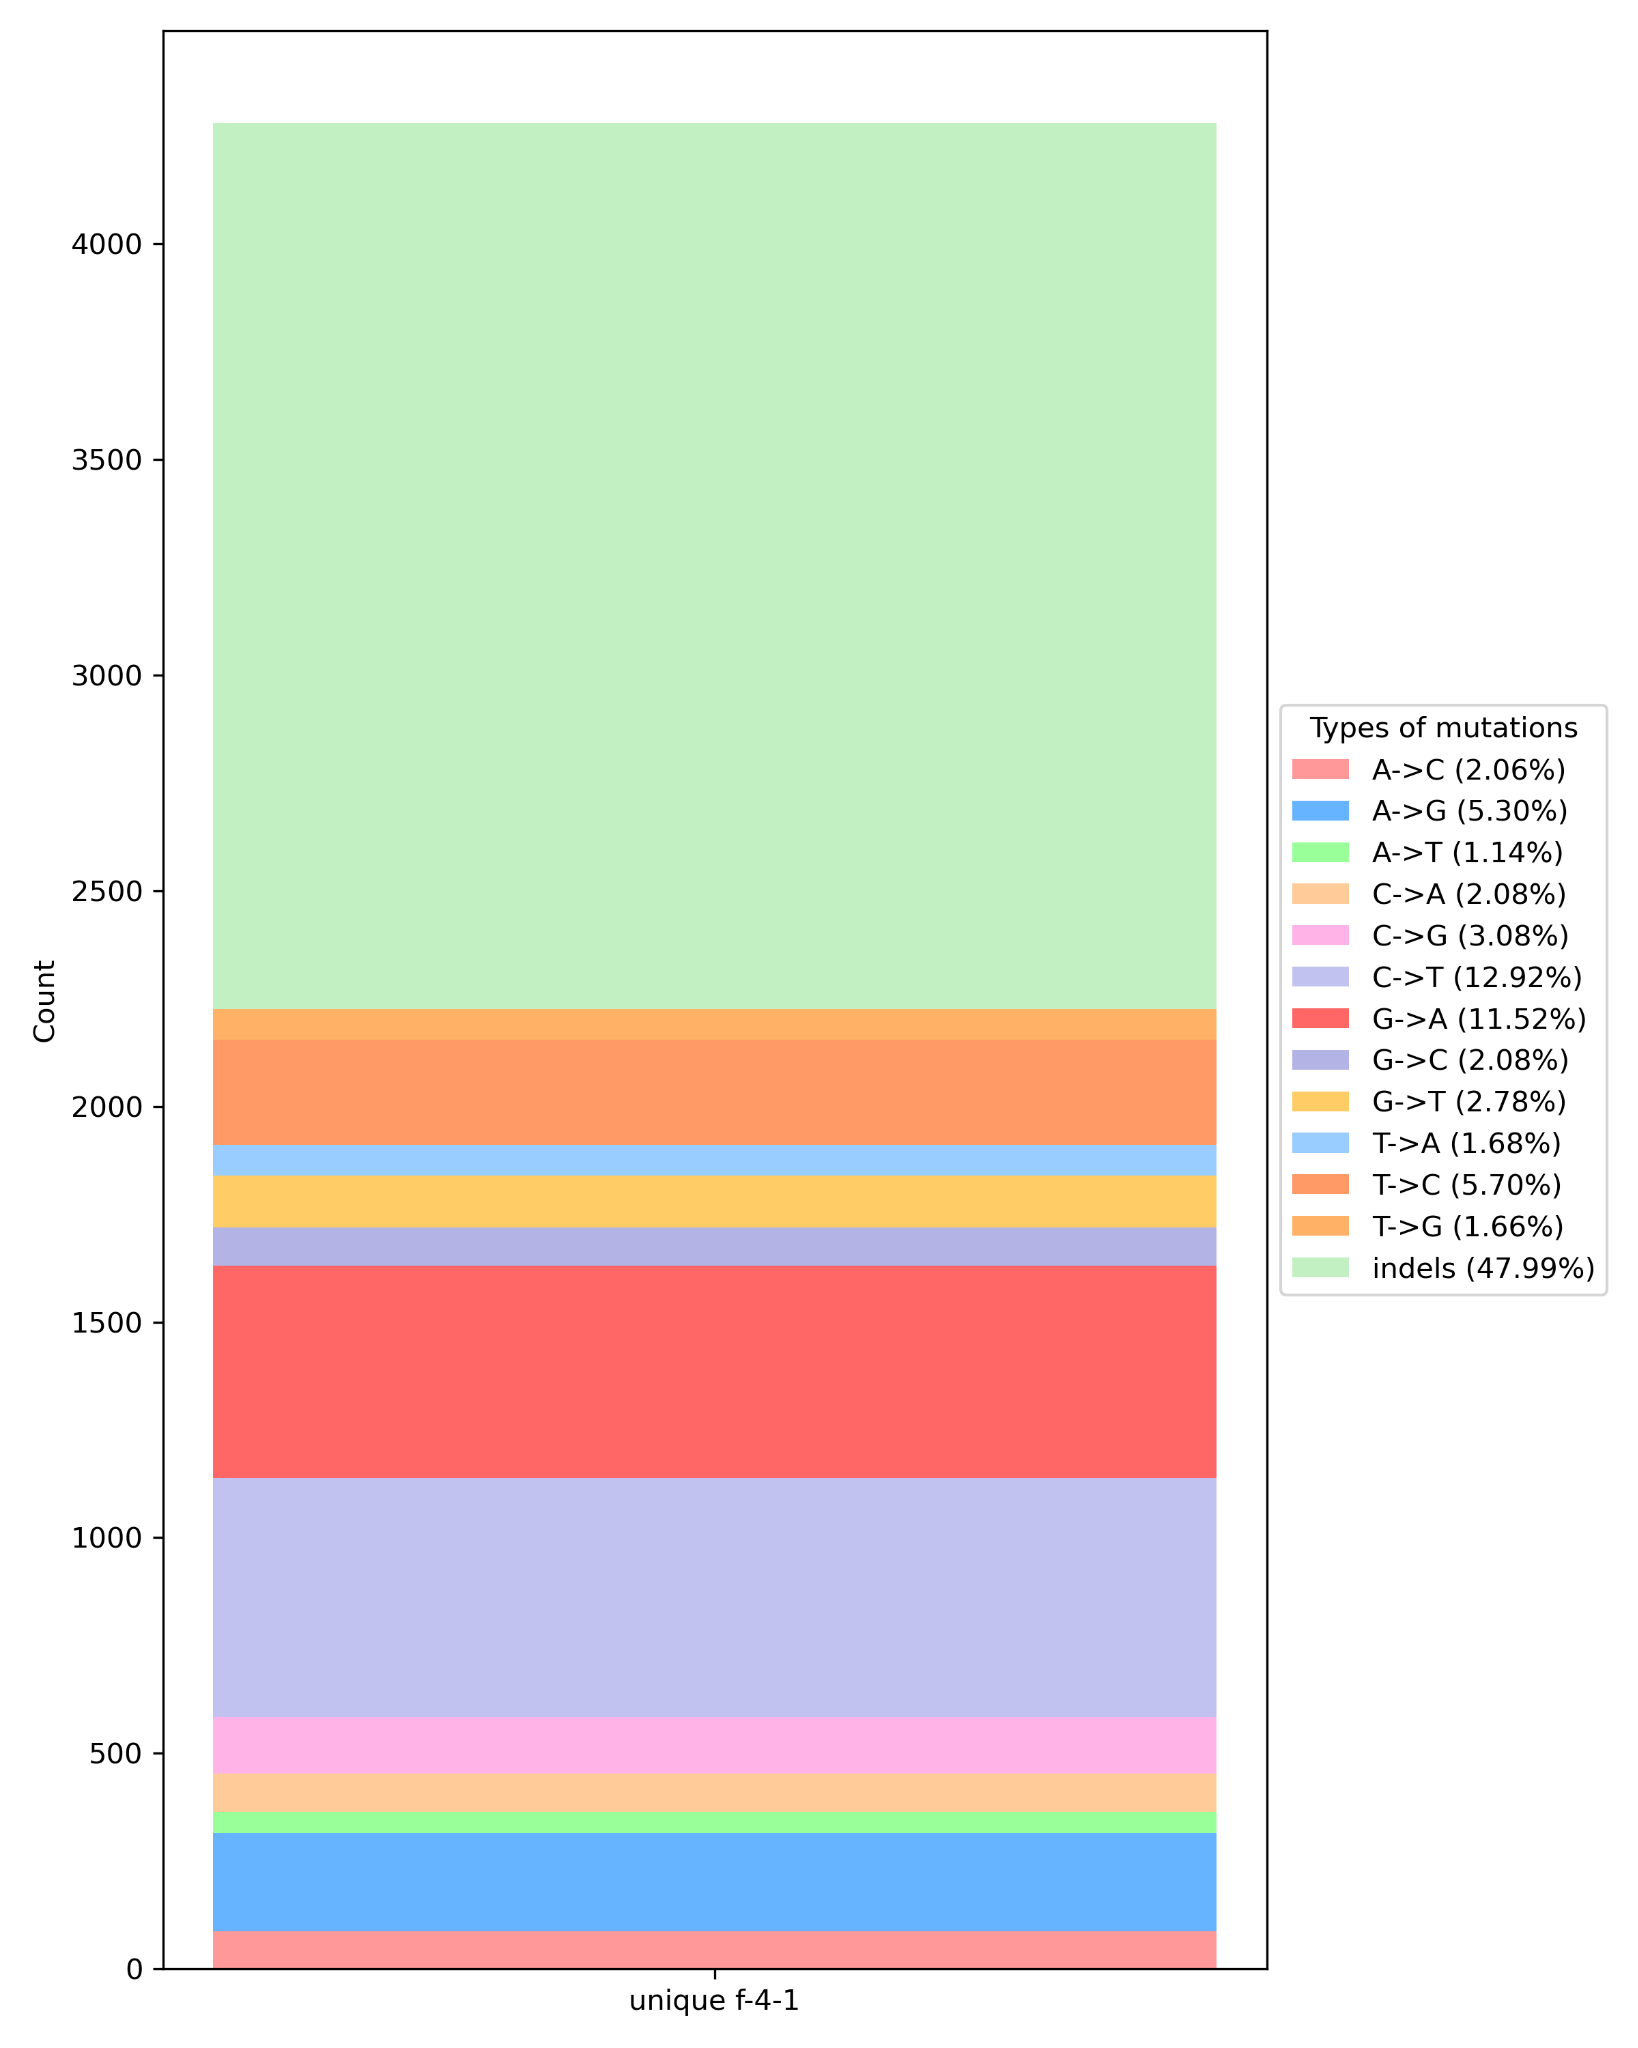

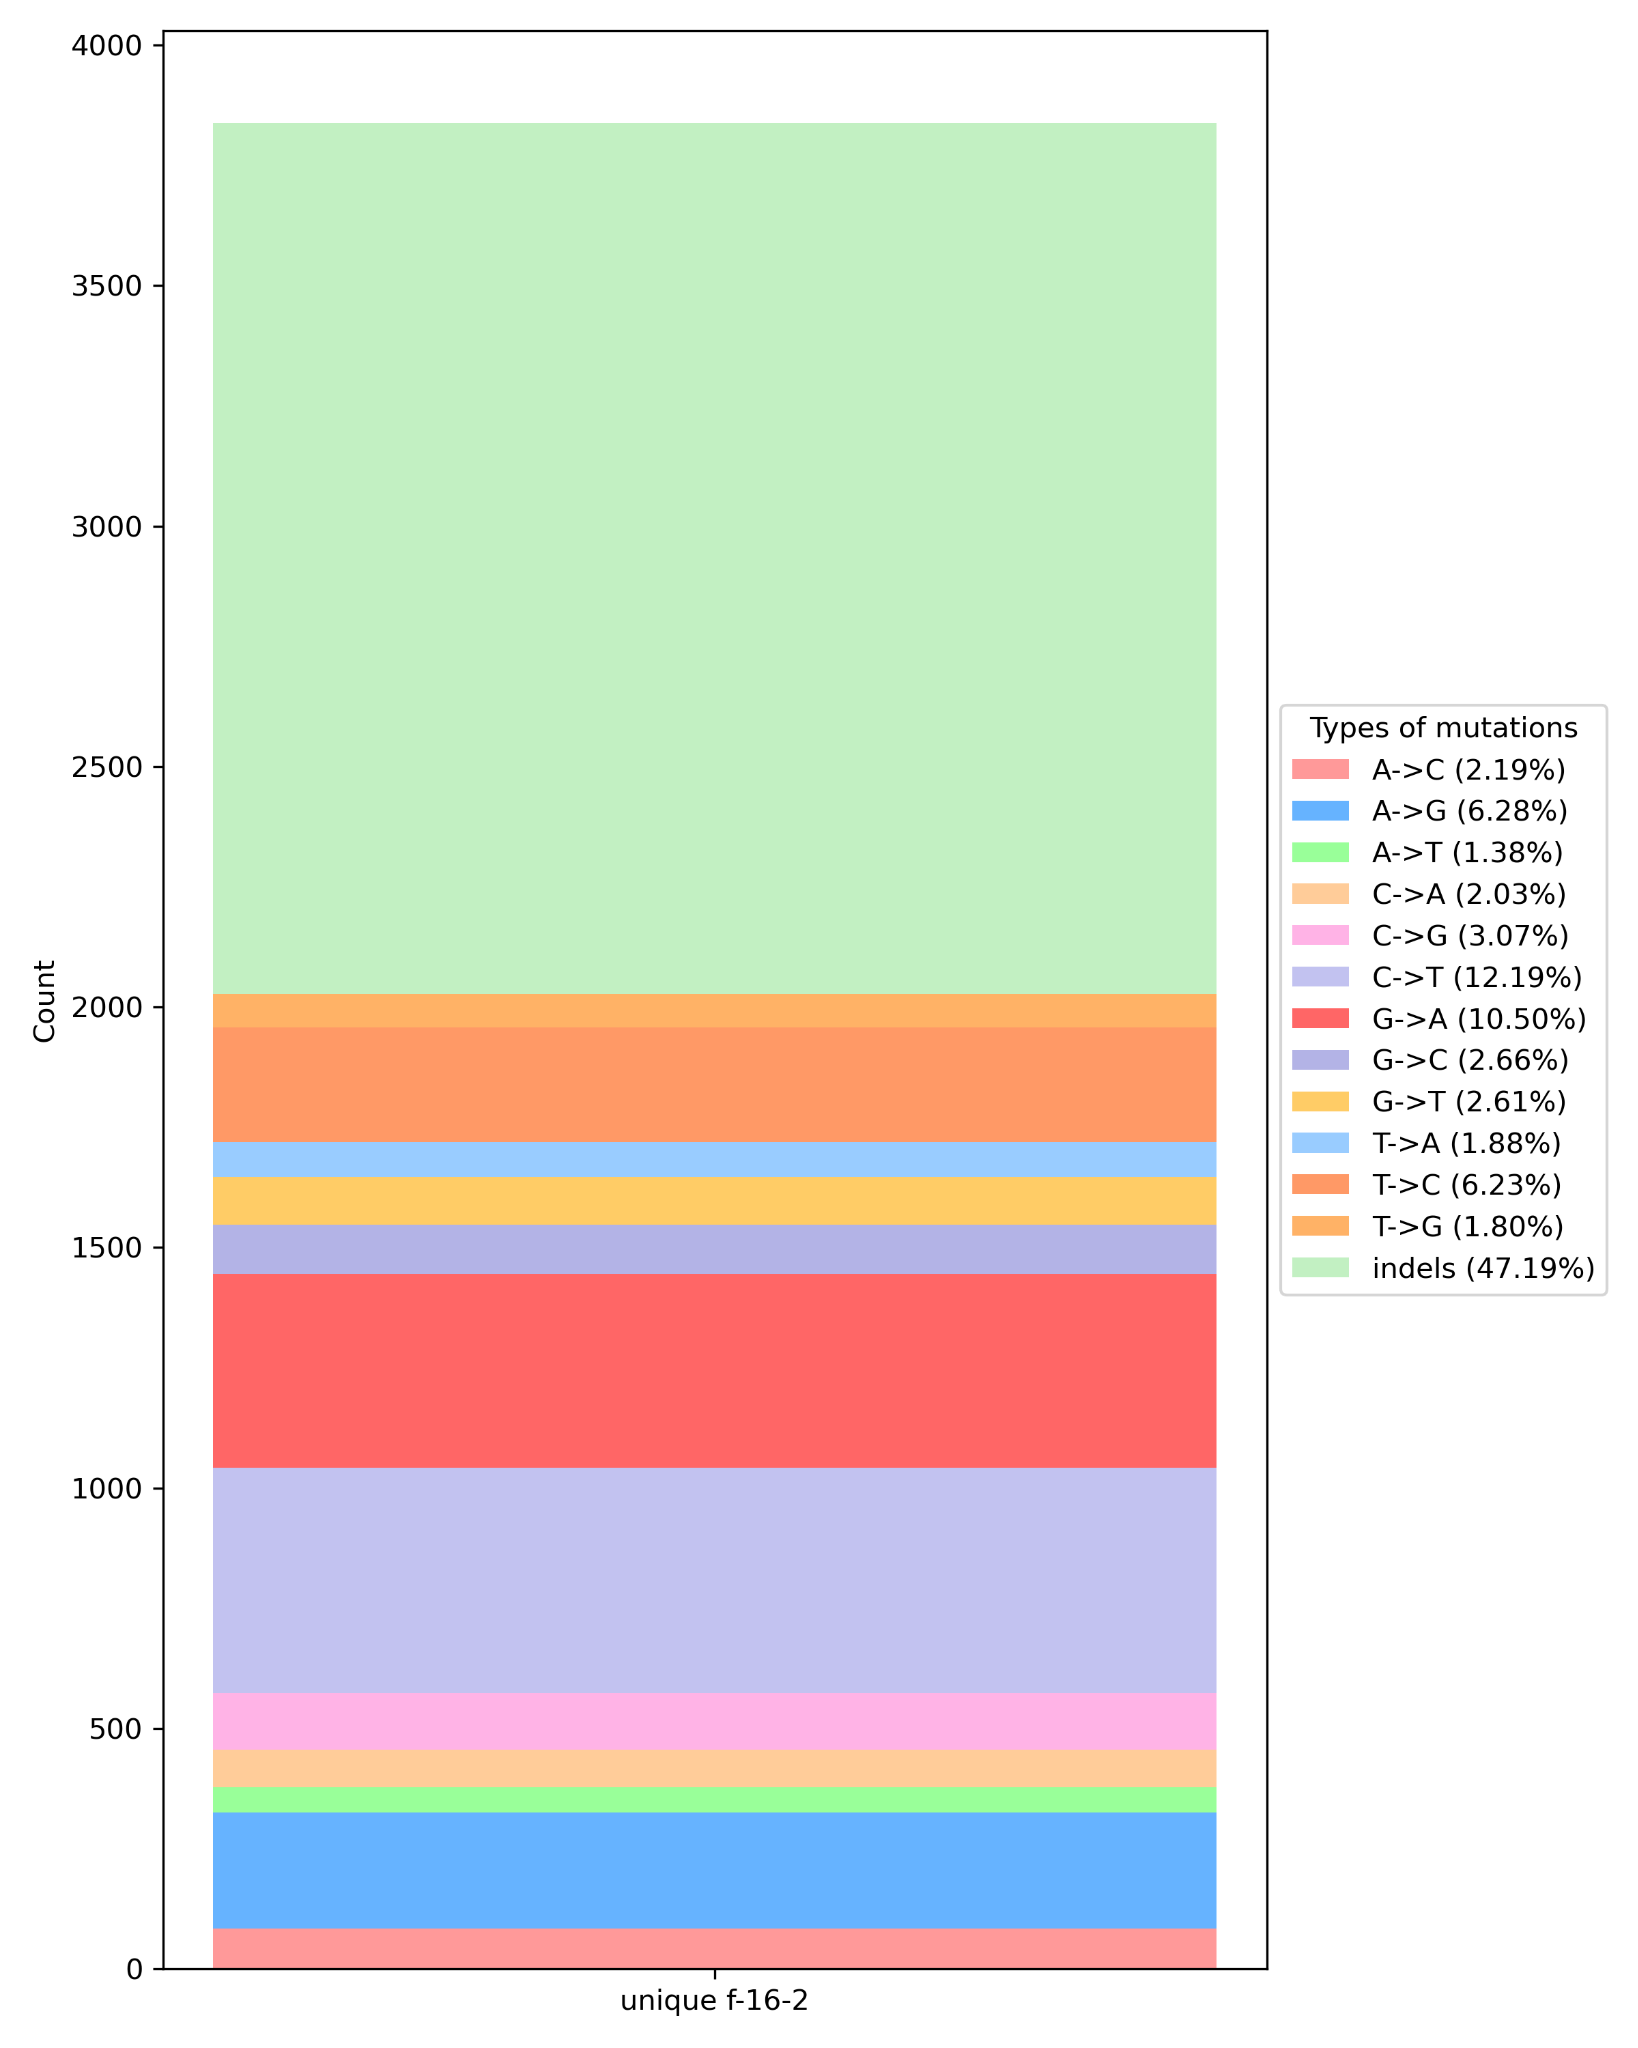


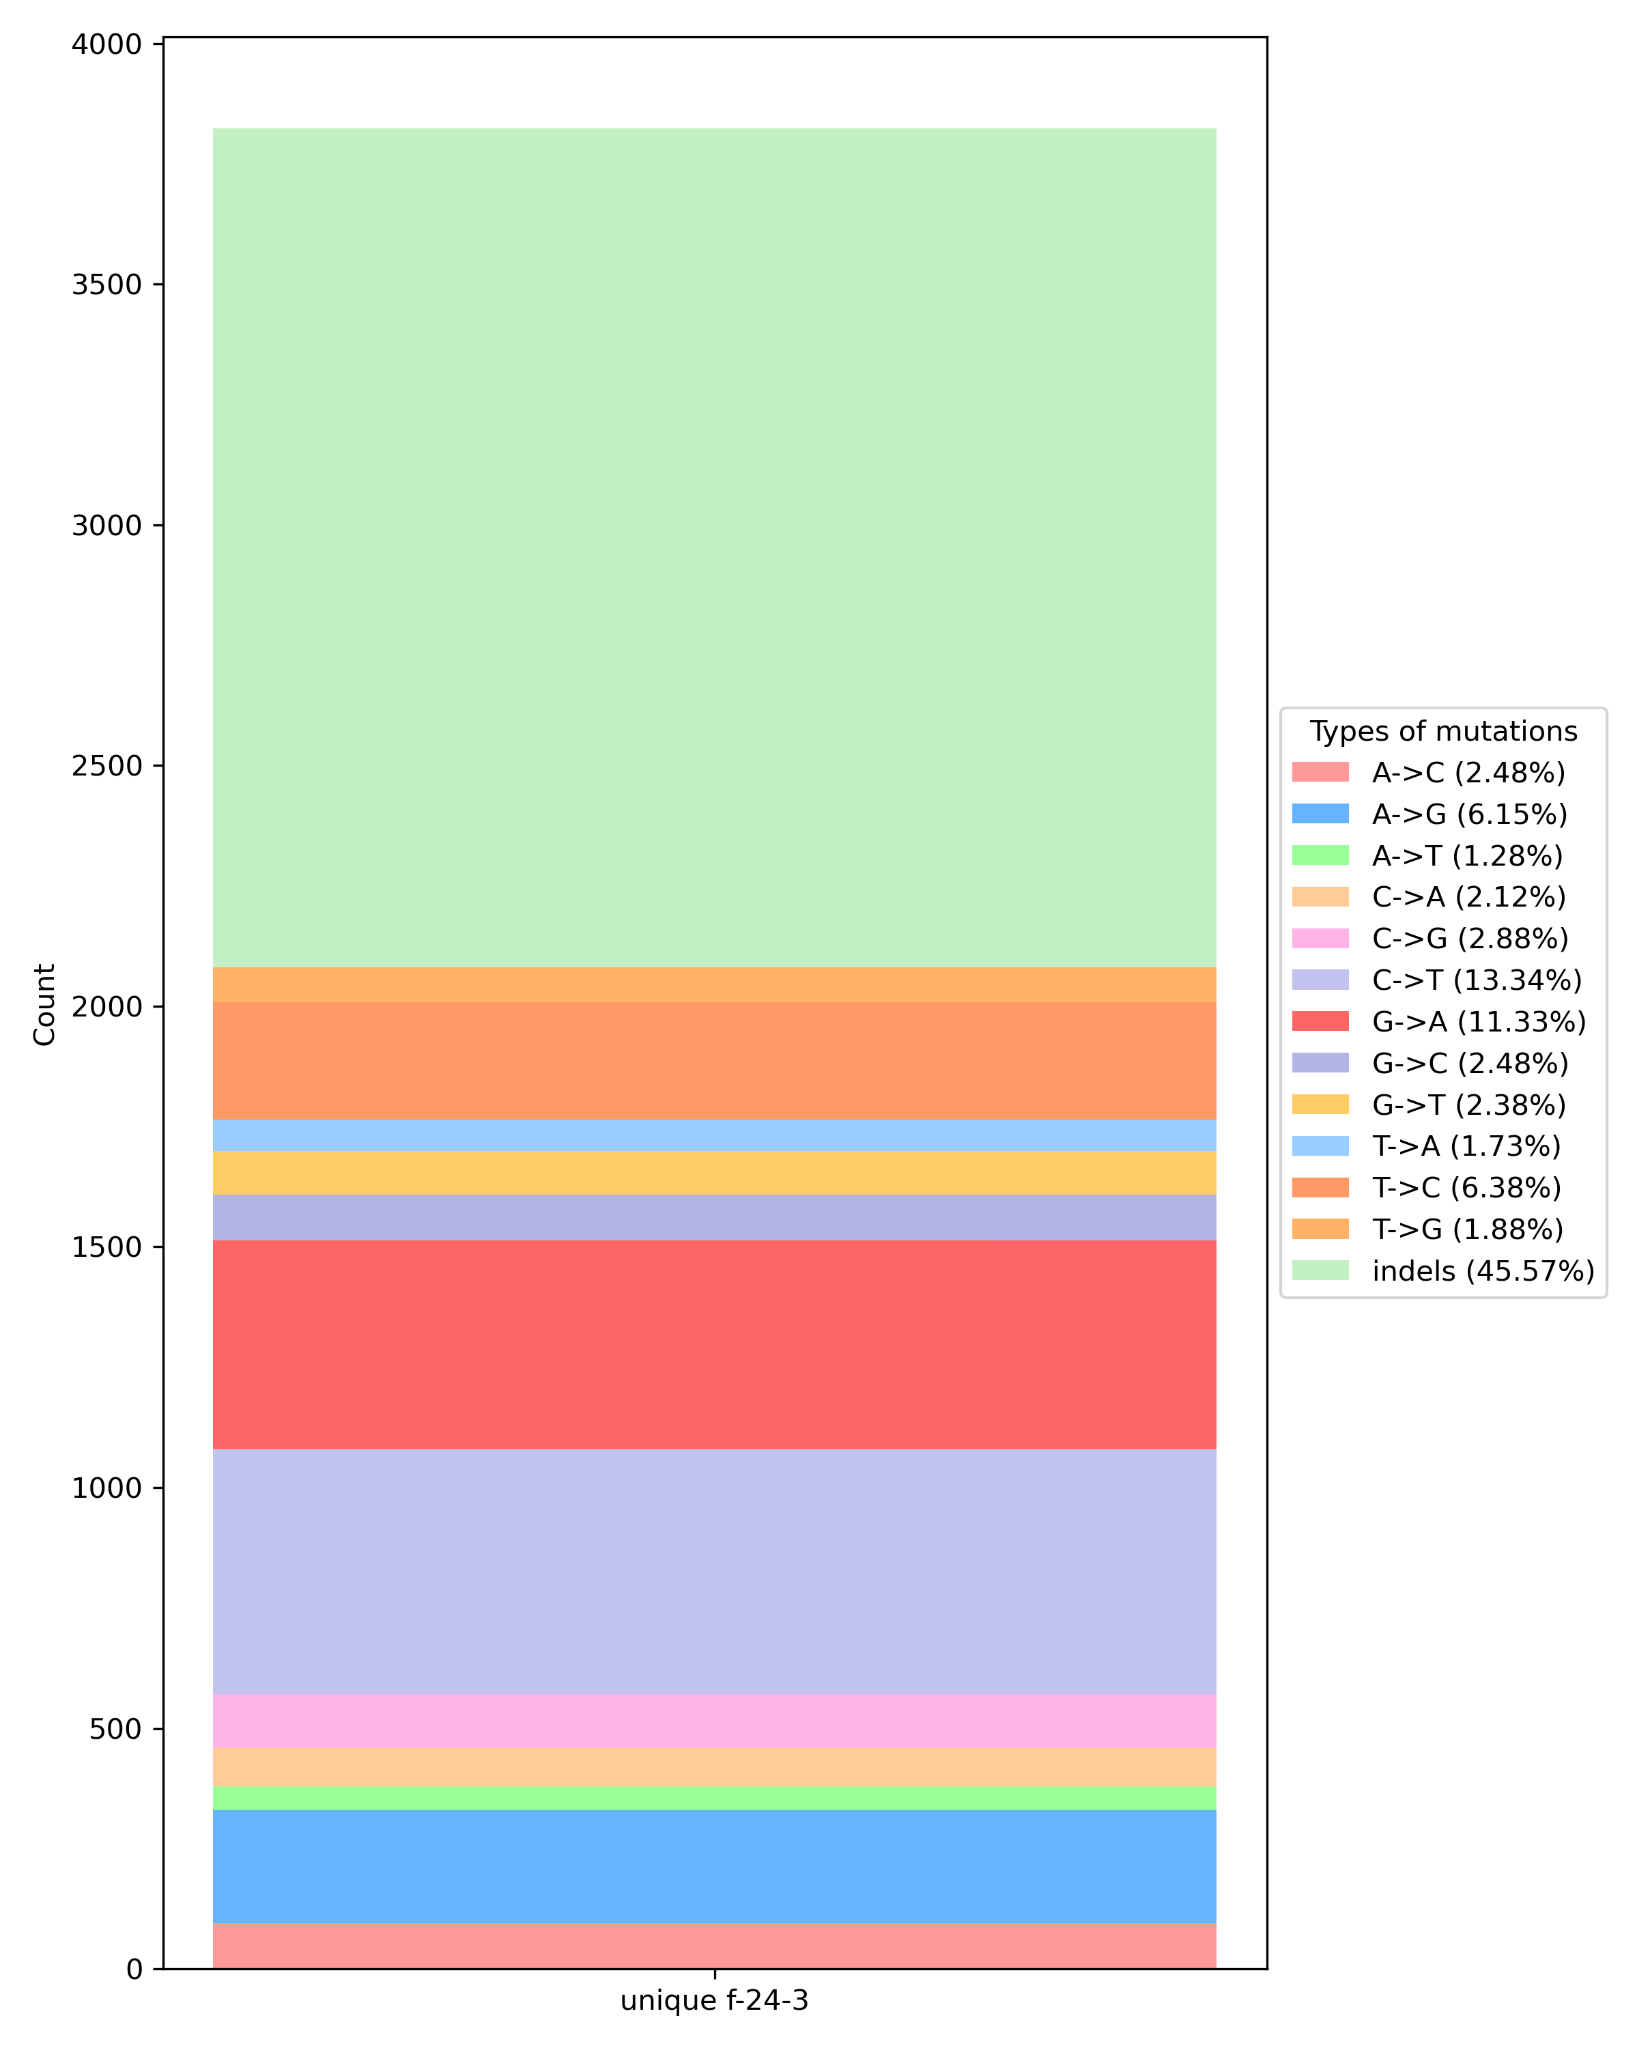


**Figure 11.** Percentage distribution of mutation types among unique PTA-WES and common WES/WGS variants, highlighting differences in relative mutation frequencies.


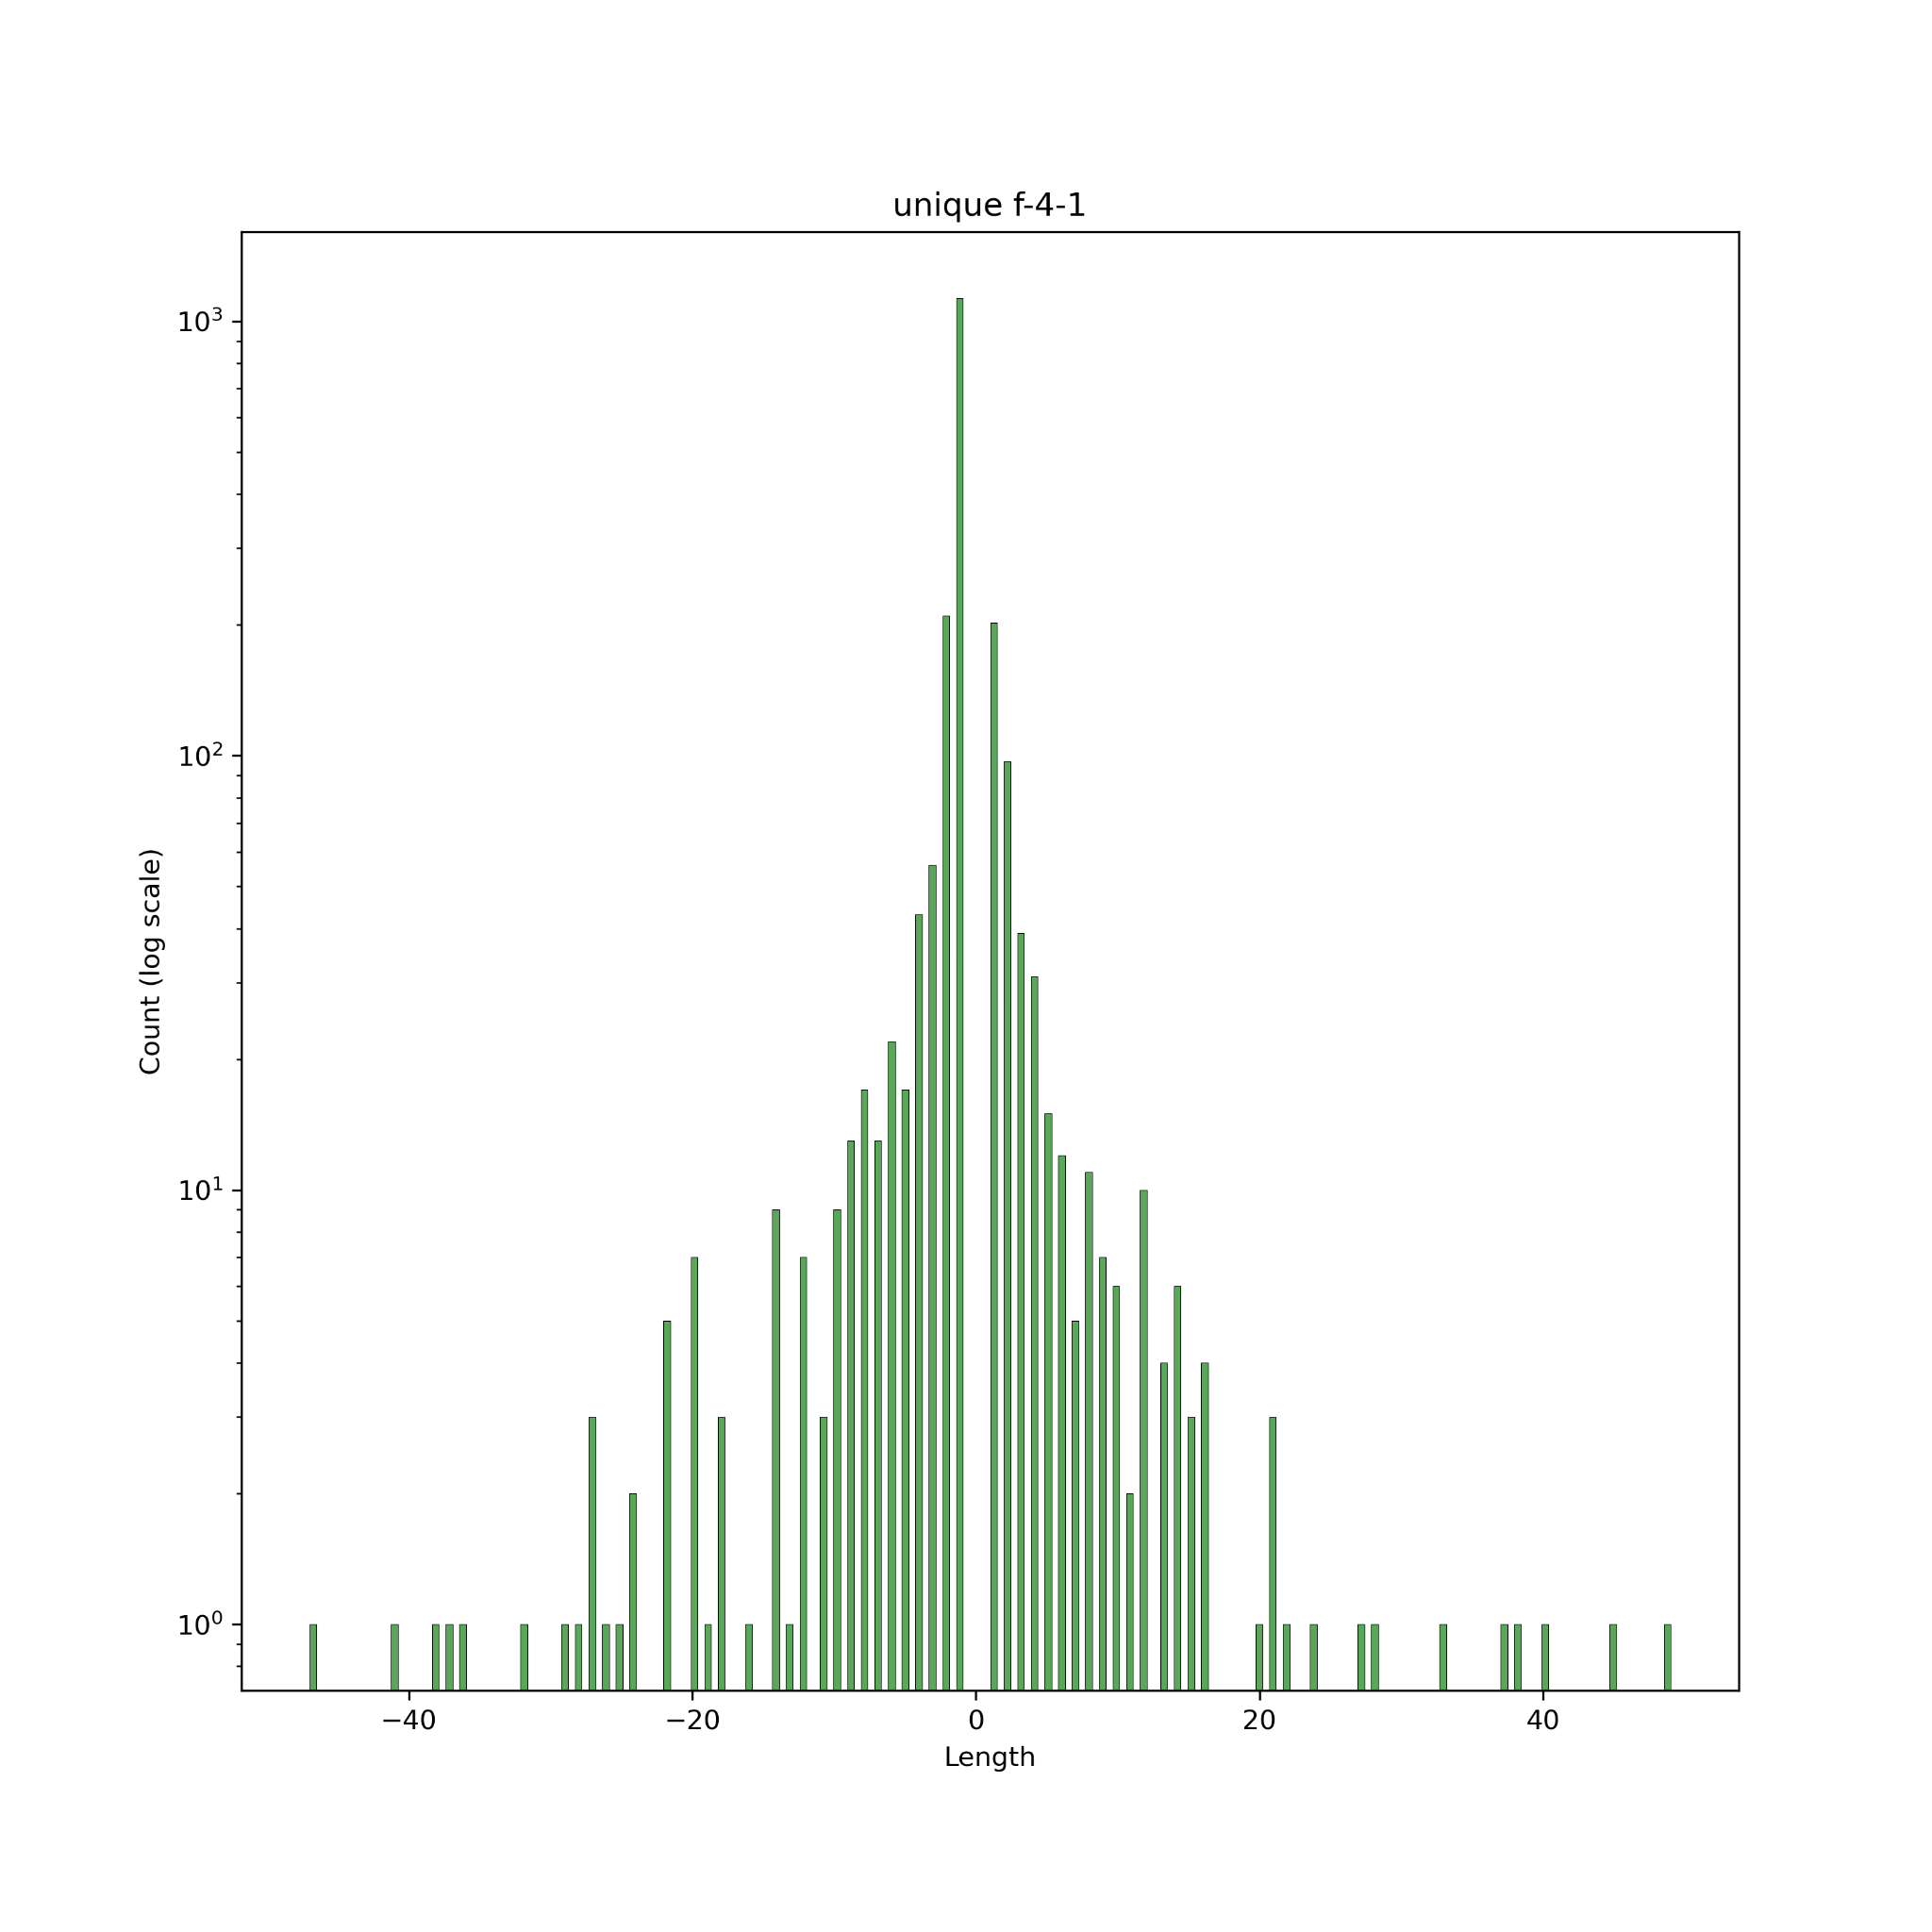

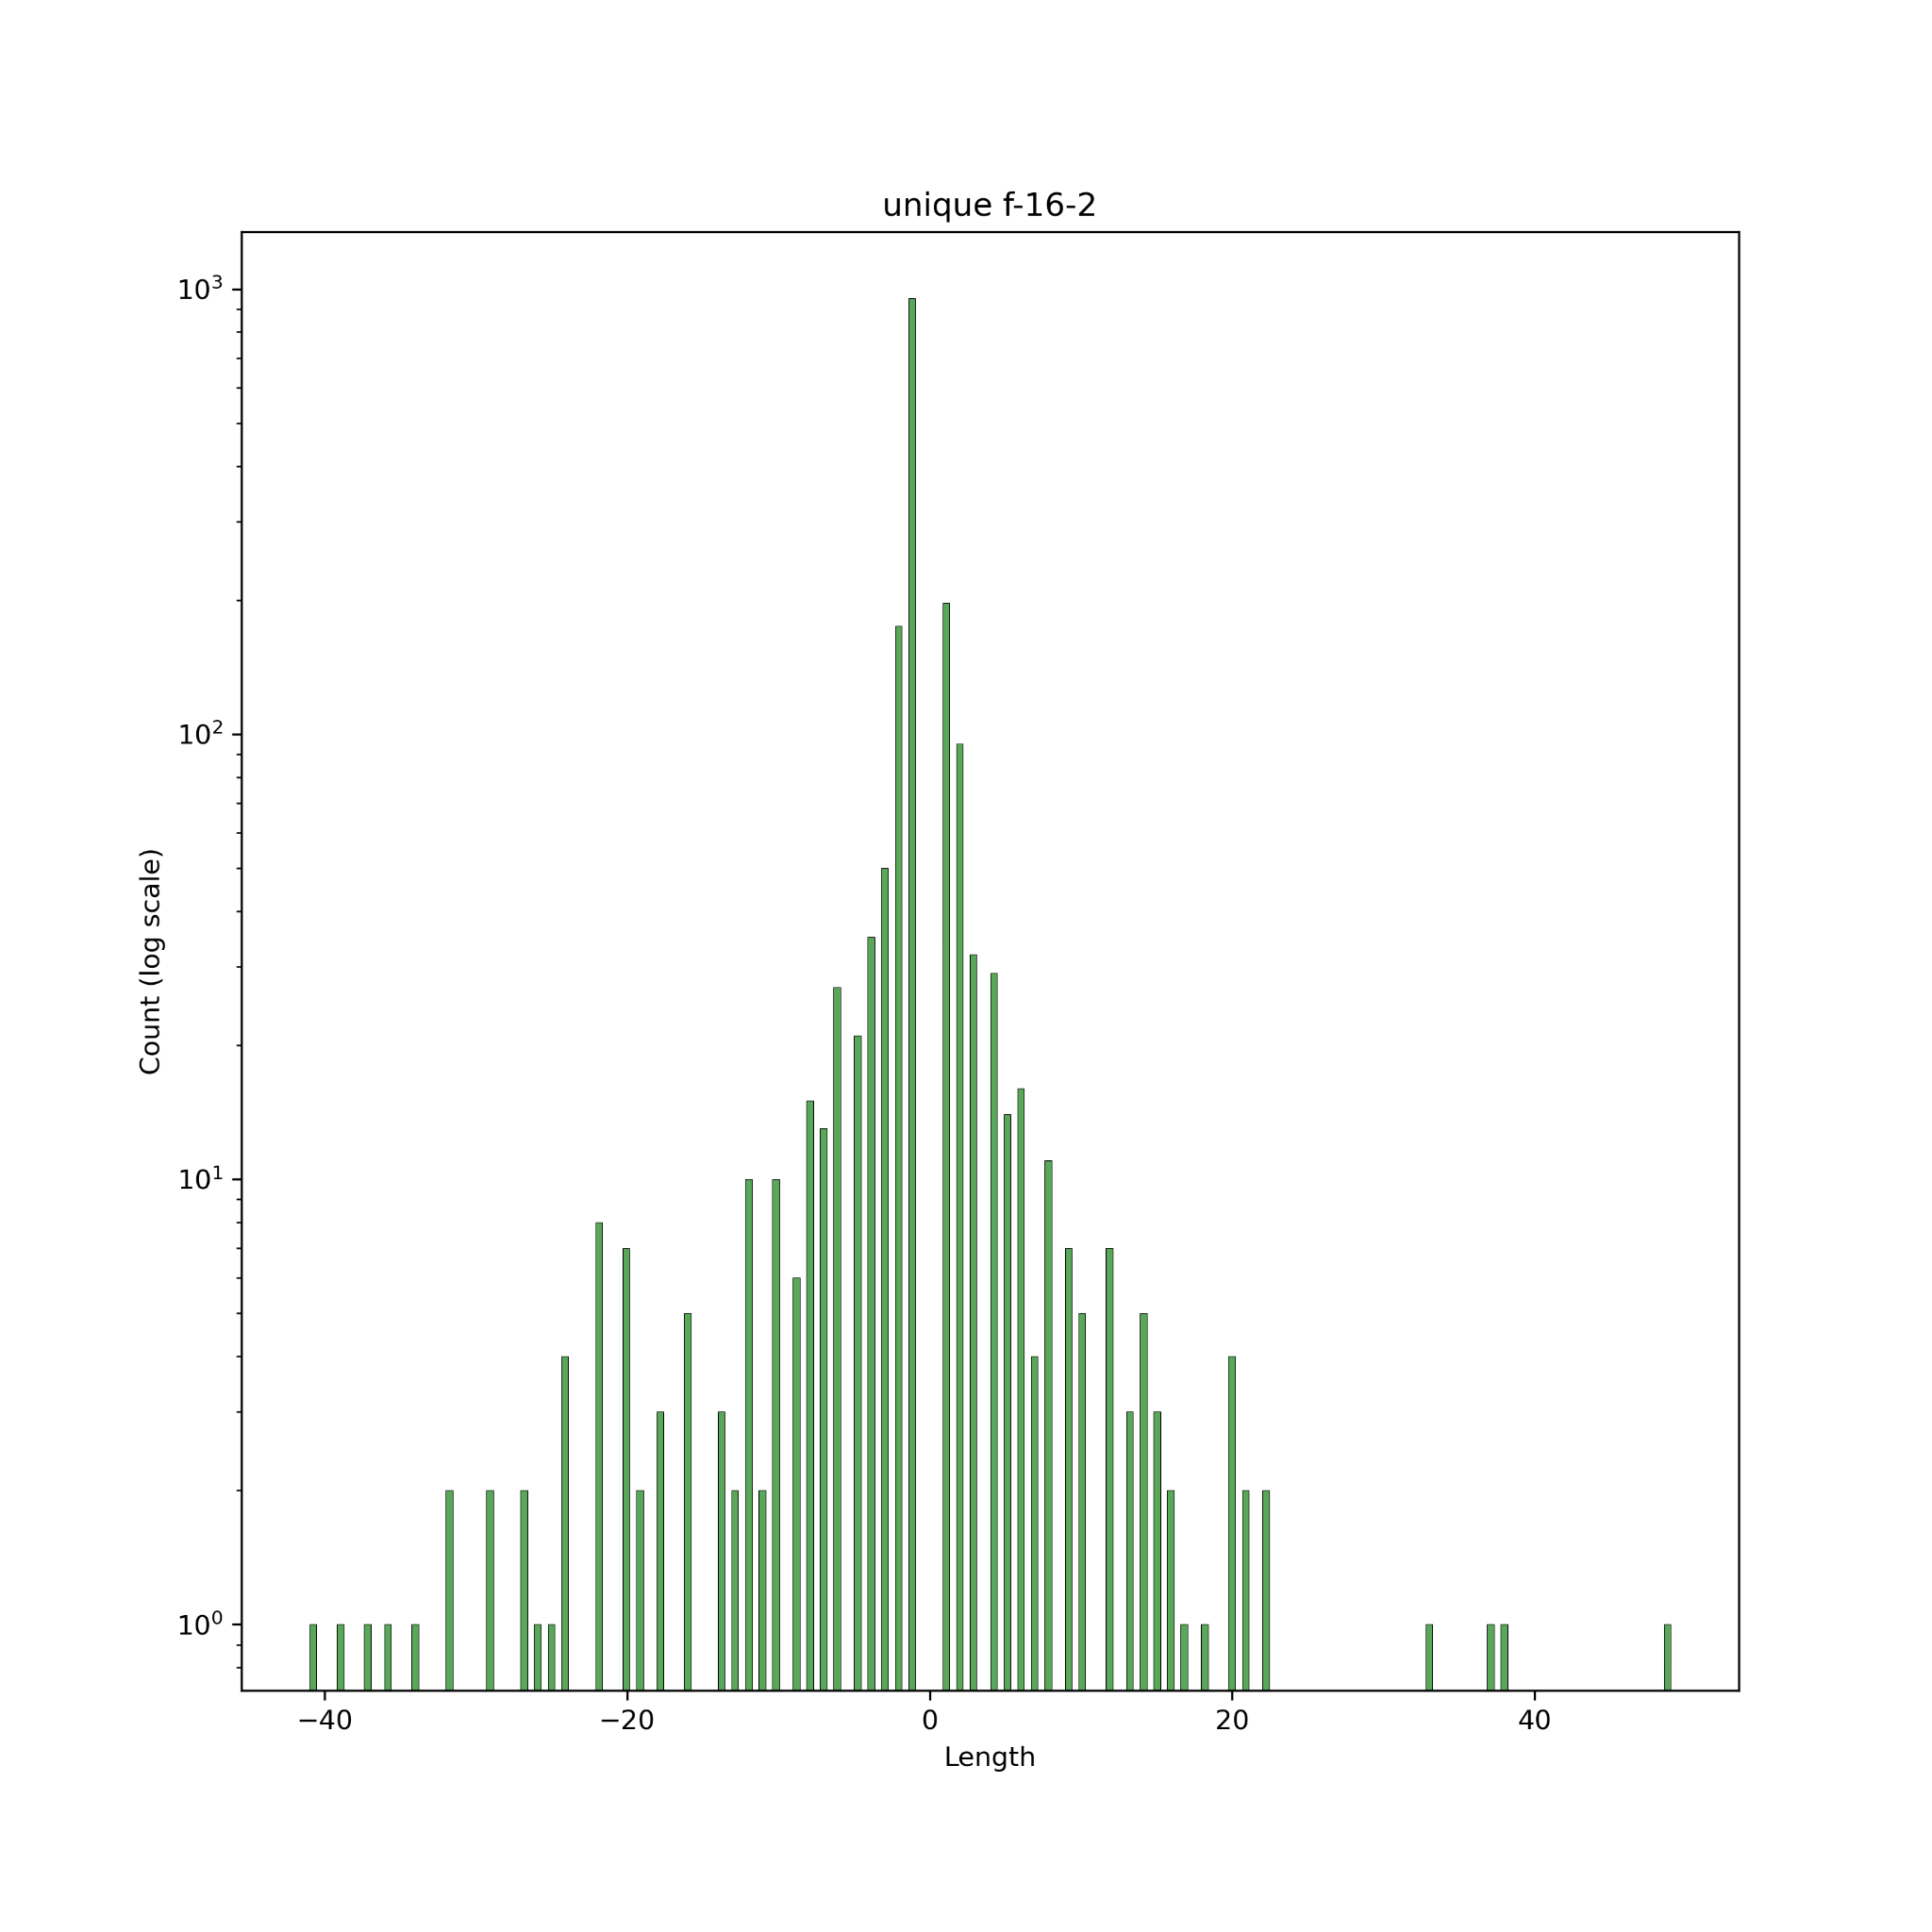


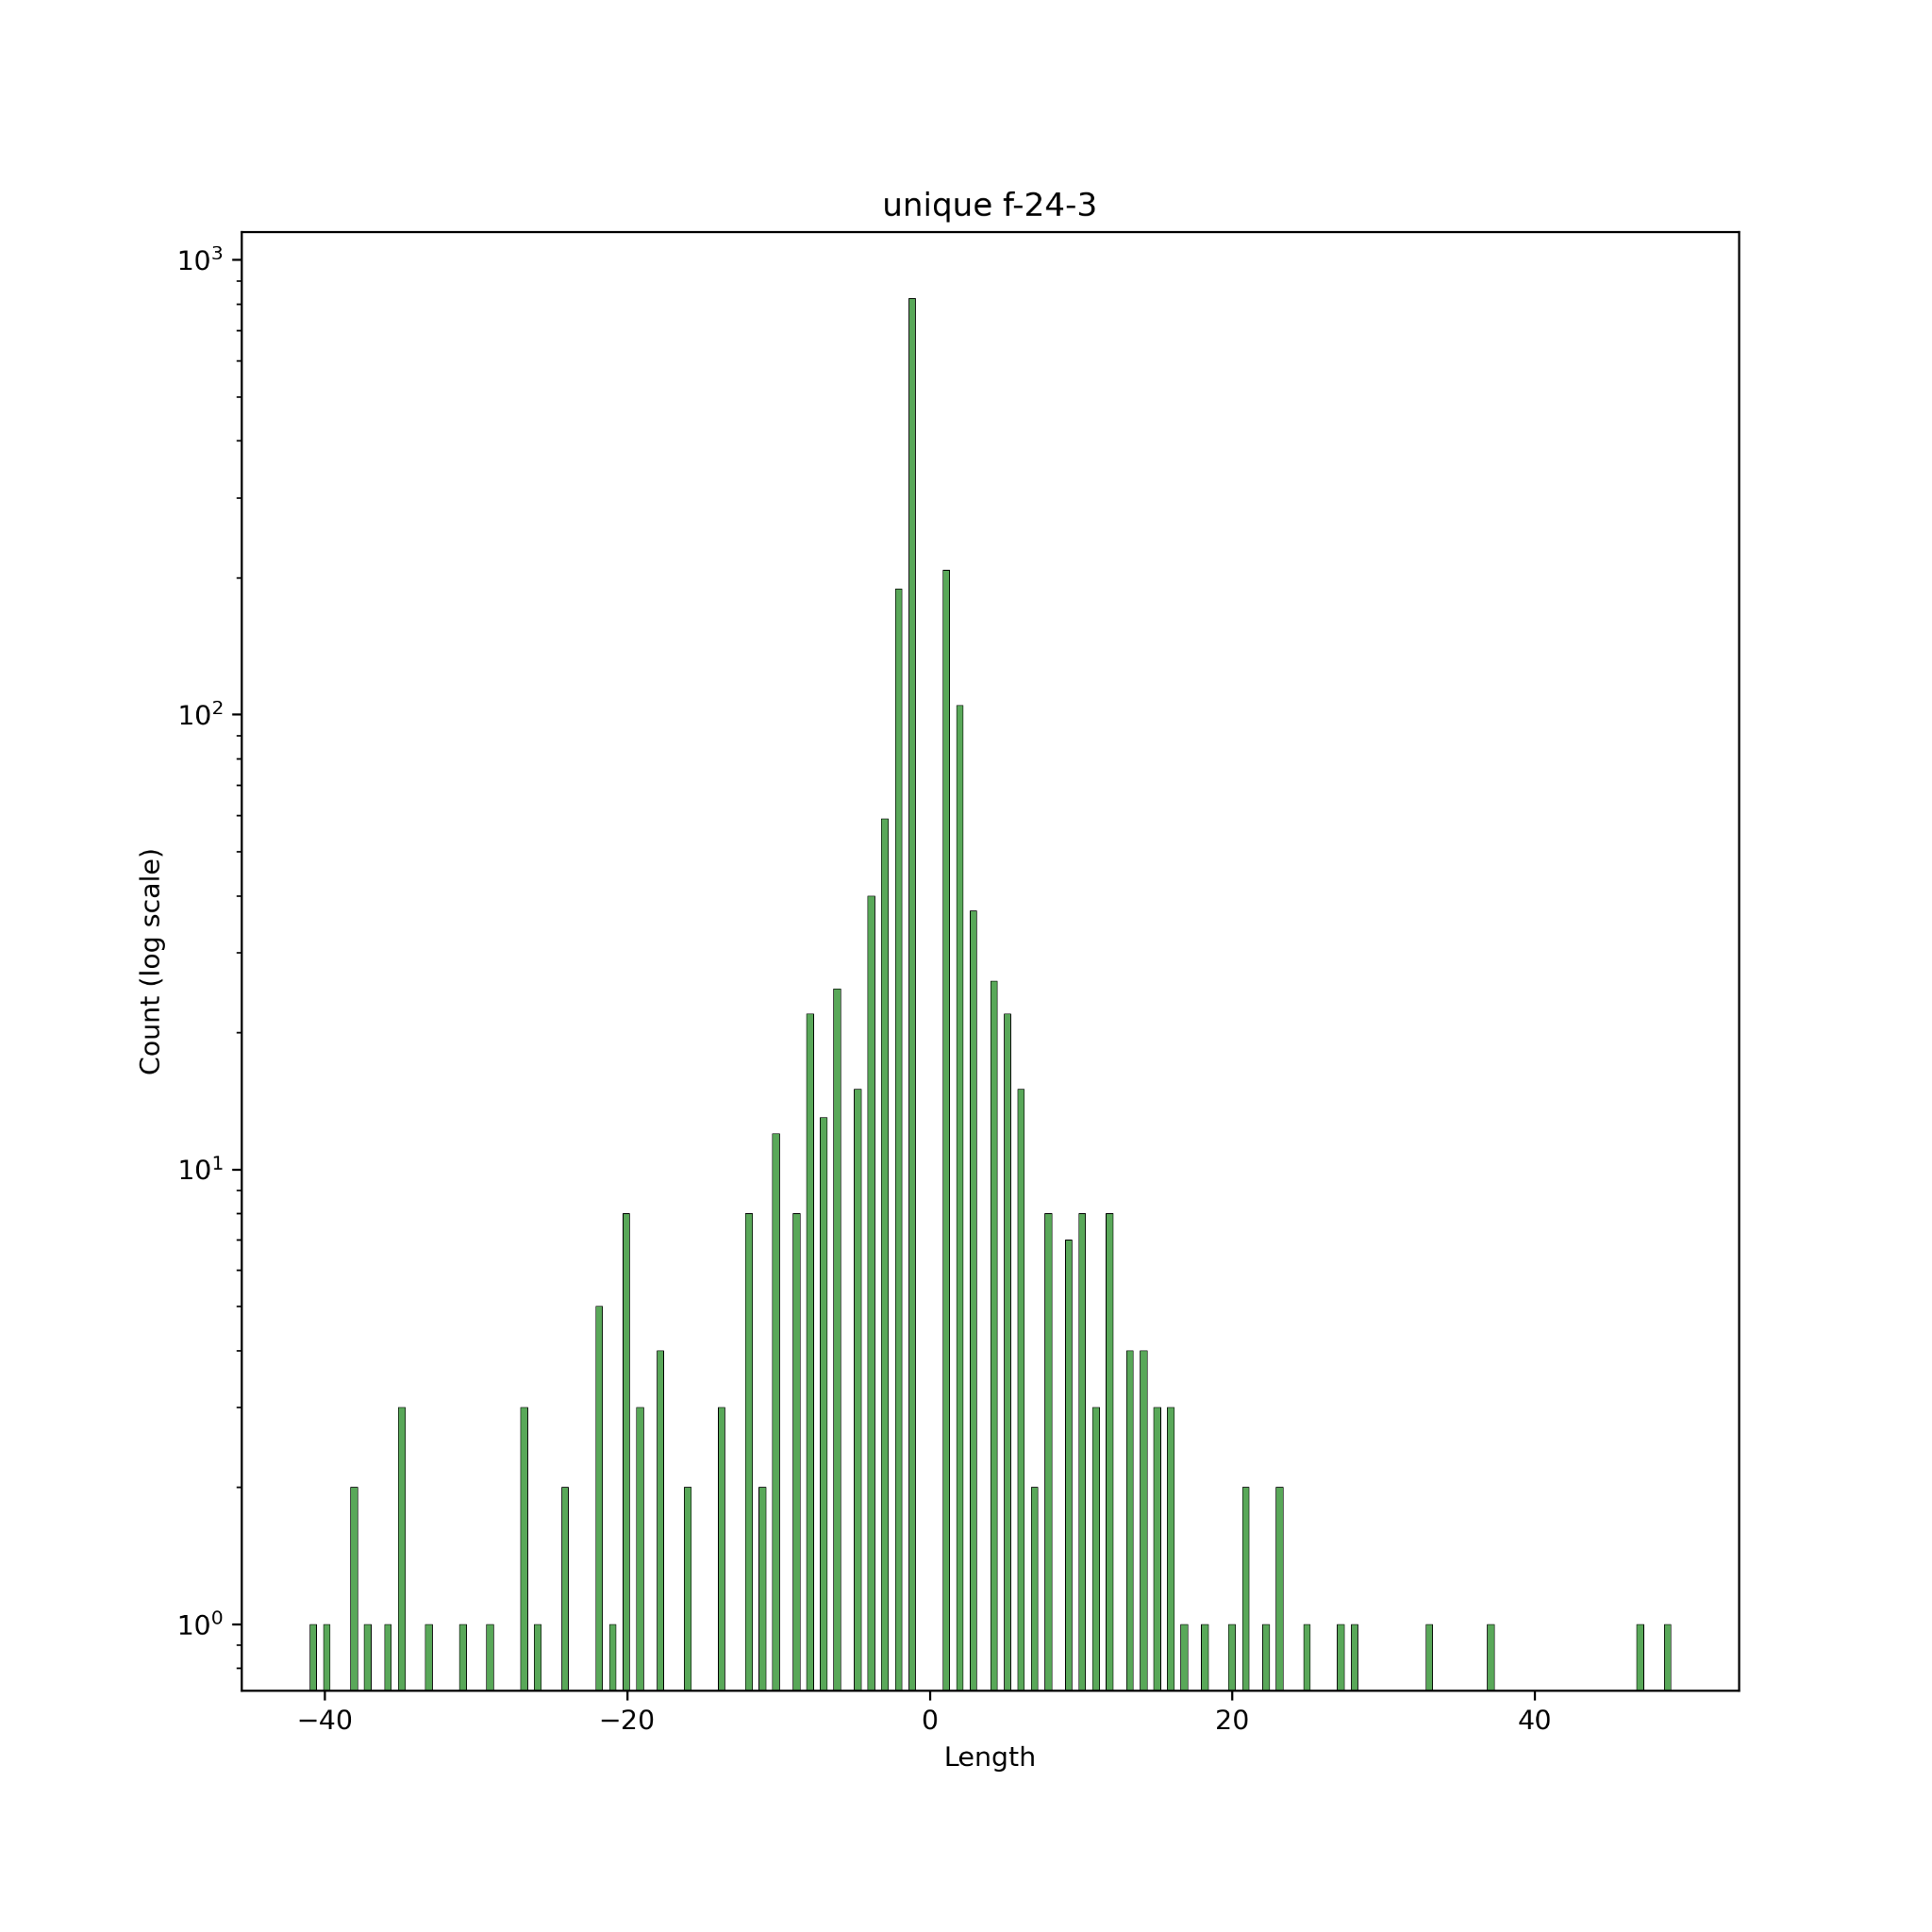


**Figure 13.** Indel length distributions among unique PTA-WES variants. Indels with a length more than 50 were excluded.


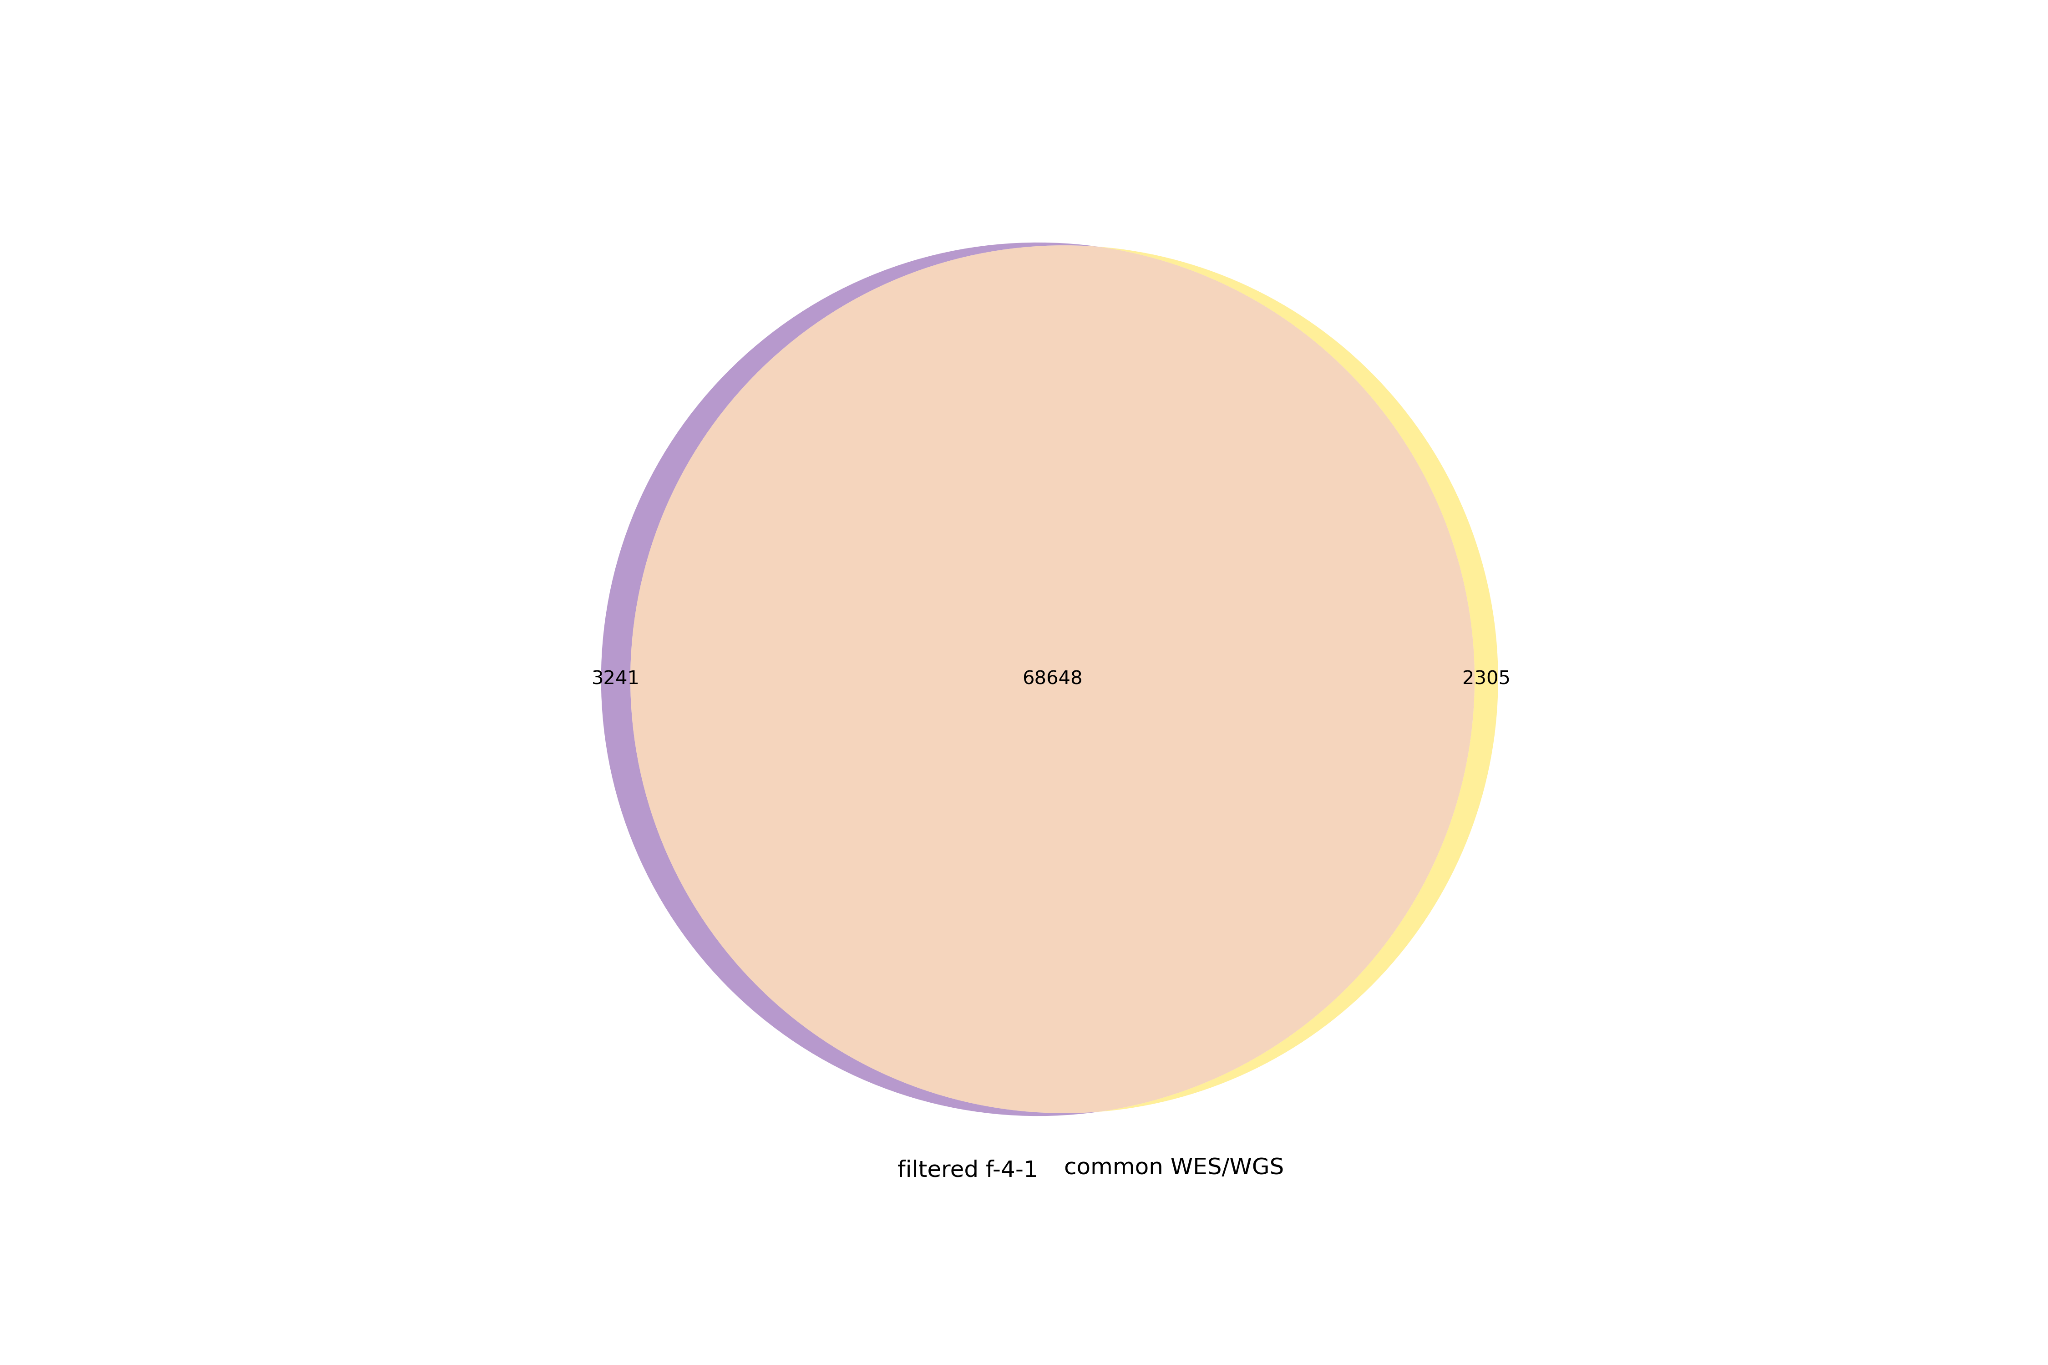

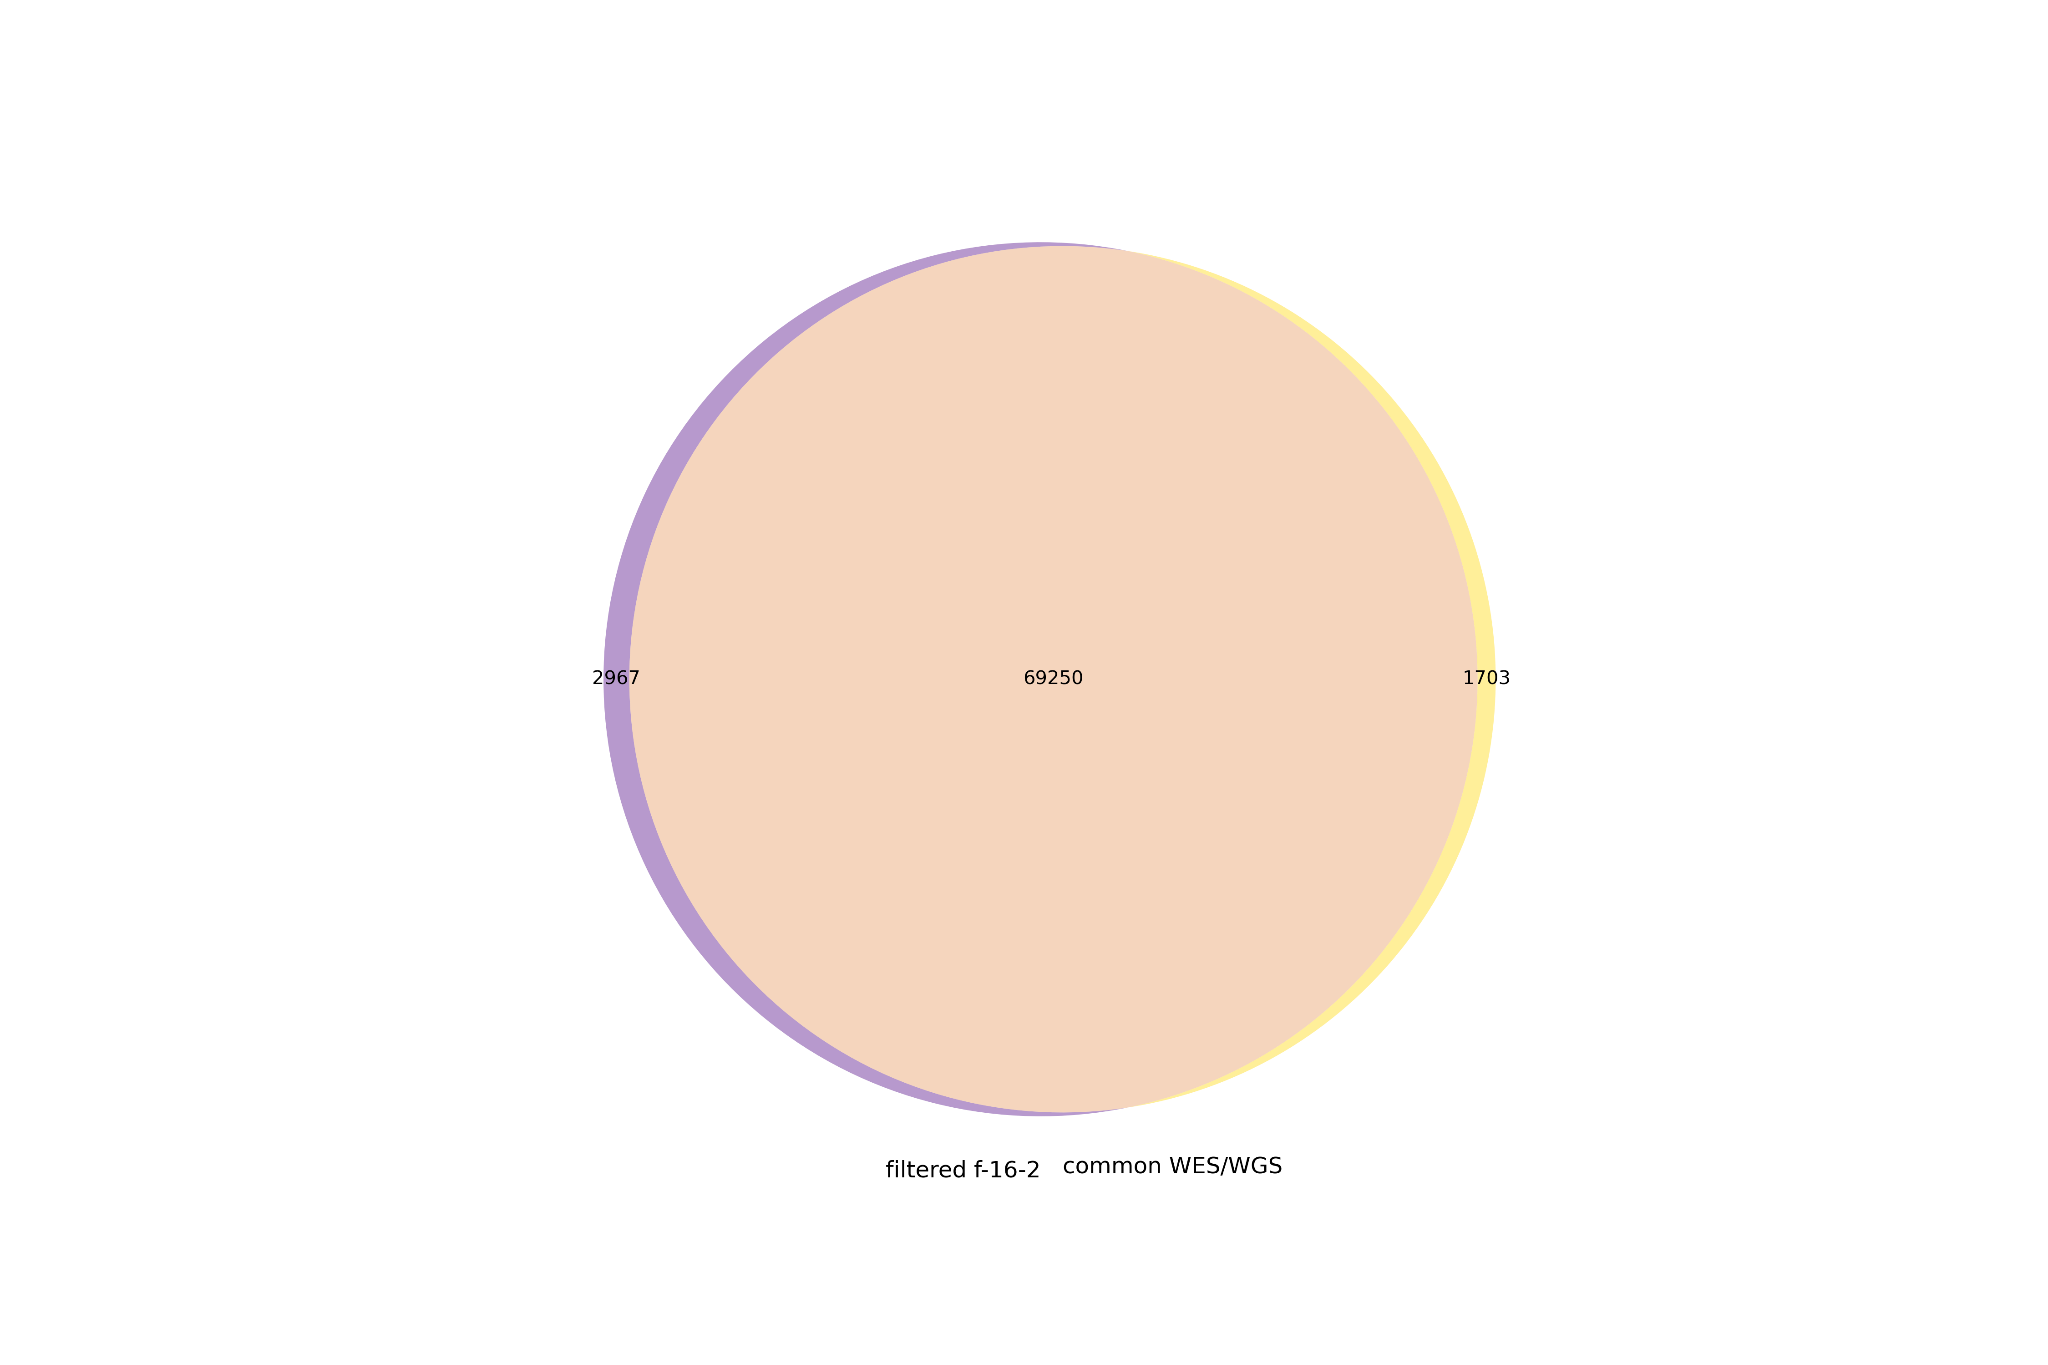


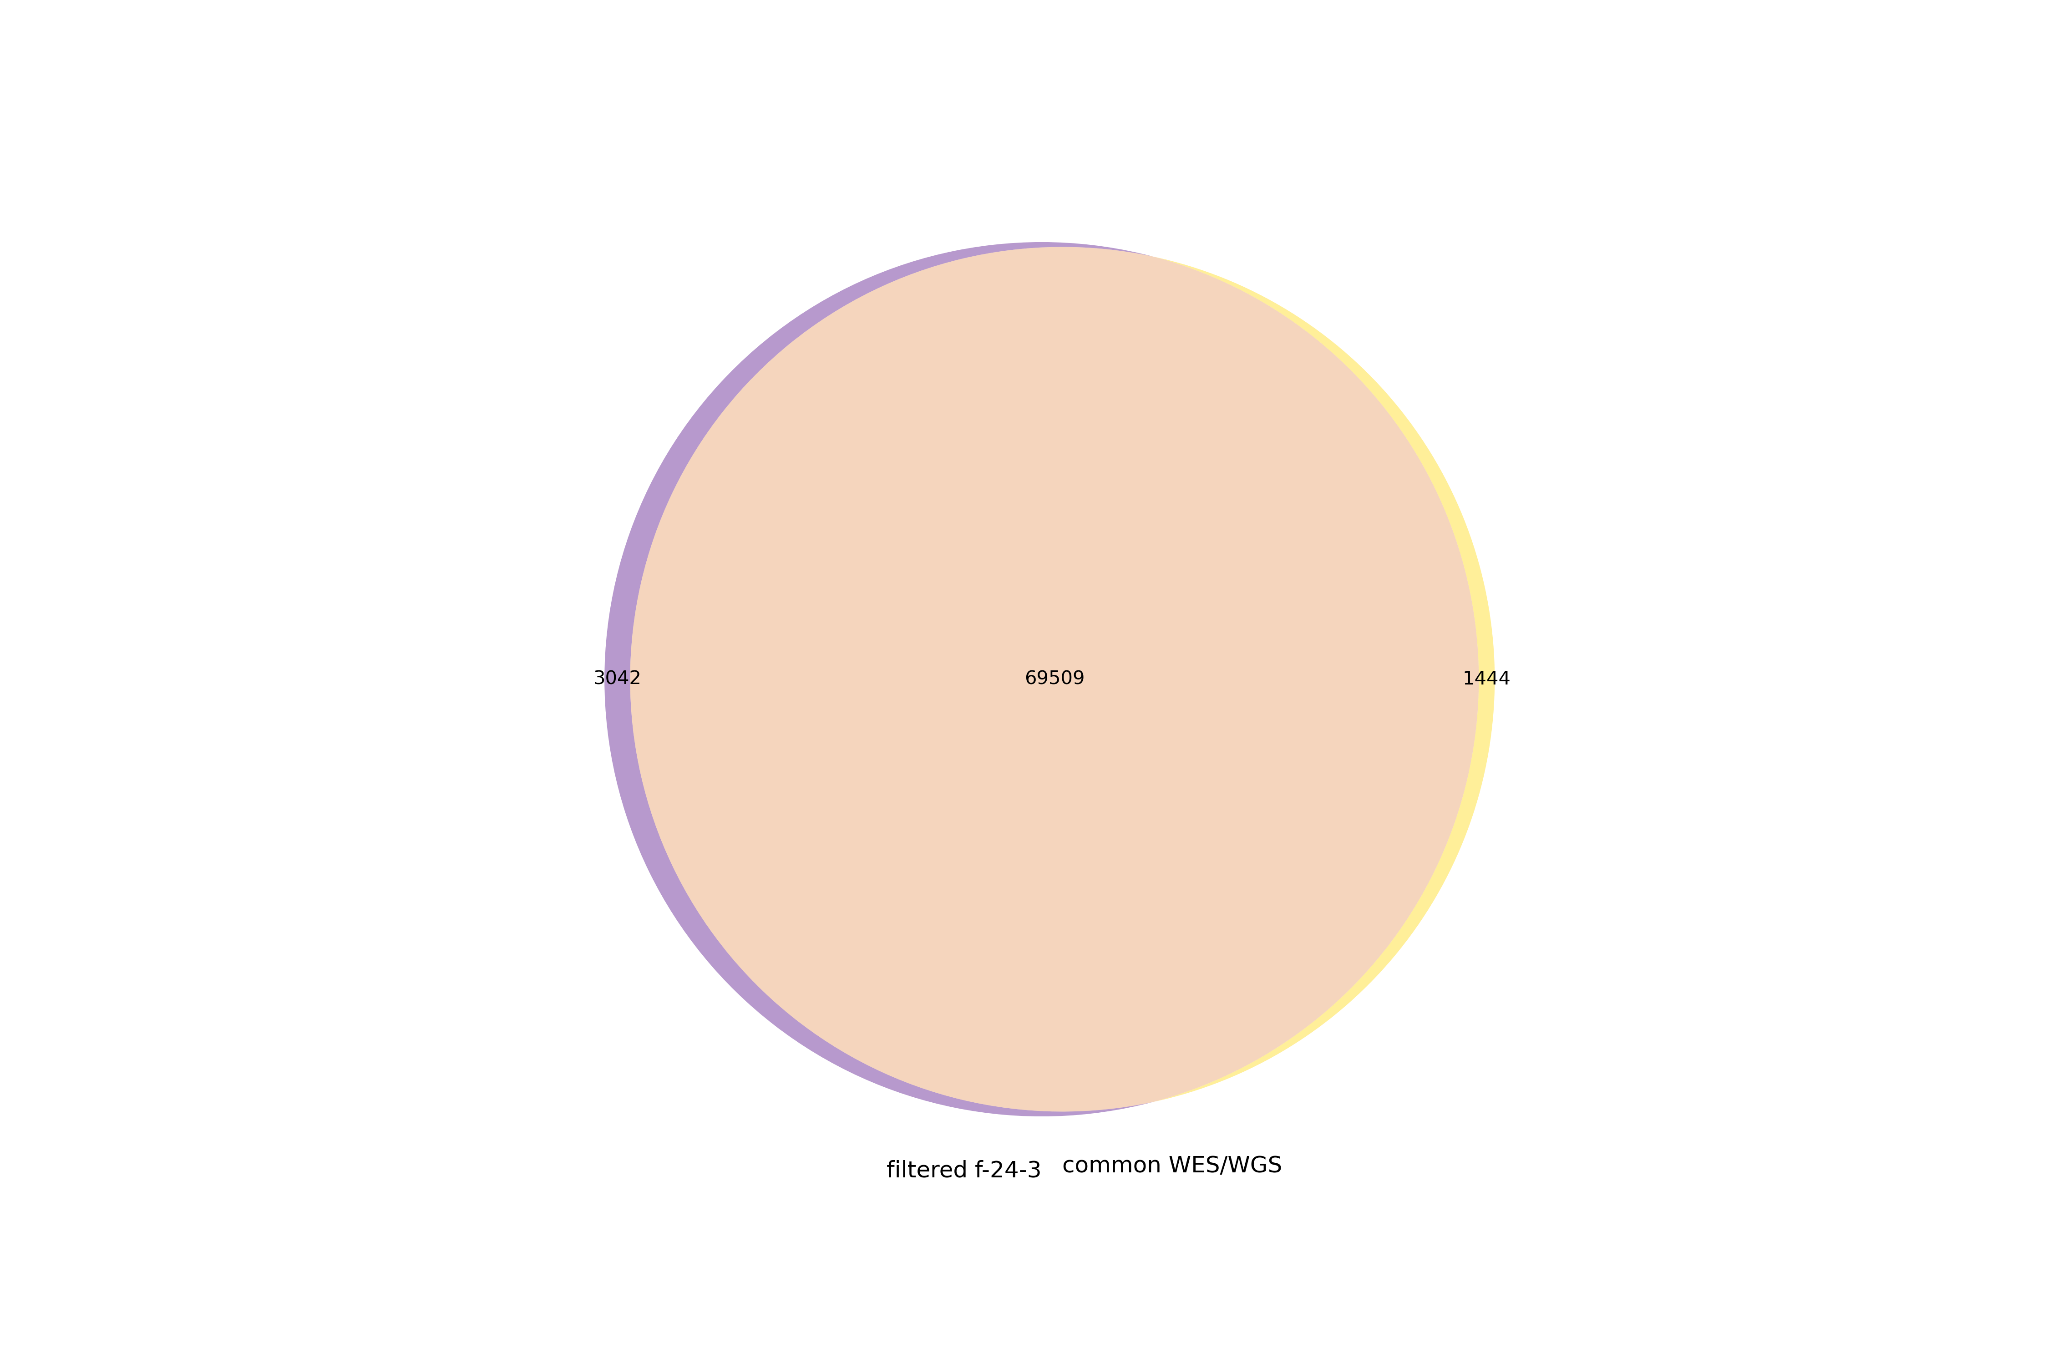


**Figure 15.** Venn diagram showing the intersection of filtered PTA-WES

and common WES/WGS variants
